# Supplementary material for: Effectiveness of interventions to reduce COVID-19 transmission in a large urban jail: a model-based analysis
Source: PubMed Central journal article supplement — BMJ Open. 2021 Feb 17;11(2):e042898. doi: 10.1136/bmjopen-2020-042898 (PMC7893212; doi:10.1136/bmjopen-2020-042898), 2021-02-17
Supplement: bmjopen-2020-042898.draft_revisions.pdf [file bmjopen-2020-042898.draft_revisions.pdf]

# BMJ Open

BMJ Open is committed to open peer review. As part of this commitment we make the peer review history of every article we publish publicly available.

When an article is published we post the peer reviewers' comments and the authors' responses online. We also post the versions of the paper that were used during peer review. These are the versions that the peer review comments apply to.

The versions of the paper that follow are the versions that were submitted during the peer review process. They are not the versions of record or the final published versions. They should not be cited or distributed as the published version of this manuscript.

BMJ Open is an open access journal and the full, final, typeset and author-corrected version of record of the manuscript is available on our site with no access controls, subscription charges or pay-per-view fees (<http://bmjopen.bmj.com>).

If you have any questions on BMJ Open's open peer review process please email [info.bmjopen@bmj.com](mailto:info.bmjopen@bmj.com)

# BMJ Open

## The effectiveness of interventions to reduce COVID-19 transmission in a large urban jail

|                               |                                                                                                                                                                                                                                                                                                                                                                                                                             |
|-------------------------------|-----------------------------------------------------------------------------------------------------------------------------------------------------------------------------------------------------------------------------------------------------------------------------------------------------------------------------------------------------------------------------------------------------------------------------|
| Journal:                      | <i>BMJ Open</i>                                                                                                                                                                                                                                                                                                                                                                                                             |
| Manuscript ID                 | bmjopen-2020-042898                                                                                                                                                                                                                                                                                                                                                                                                         |
| Article Type:                 | Original research                                                                                                                                                                                                                                                                                                                                                                                                           |
| Date Submitted by the Author: | 18-Jul-2020                                                                                                                                                                                                                                                                                                                                                                                                                 |
| Complete List of Authors:     | MALLOY, GIOVANNI; Stanford University, Management Science and Engineering<br>Puglisi, Lisa; Yale University, Internal Medicine; VA Connecticut Healthcare System, Pain Research, Informatics, Multimorbidities and Education Center<br>Brandeau, Margaret ; Stanford University, Management Science and Engineering<br>Harvey, Tyler; Yale University, Internal Medicine<br>Wang, Emily; Yale University, Internal Medicine |
| Keywords:                     | COVID-19, EPIDEMIOLOGY, Health policy < HEALTH SERVICES ADMINISTRATION & MANAGEMENT, Public health < INFECTIOUS DISEASES, Infection control < INFECTIOUS DISEASES                                                                                                                                                                                                                                                           |
|                               |                                                                                                                                                                                                                                                                                                                                                                                                                             |

SCHOLARONE™  
Manuscripts

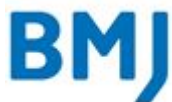

I, the Submitting Author has the right to grant and does grant on behalf of all authors of the Work (as defined in the below author licence), an exclusive licence and/or a non-exclusive licence for contributions from authors who are: i) UK Crown employees; ii) where BMJ has agreed a CC-BY licence shall apply, and/or iii) in accordance with the terms applicable for US Federal Government officers or employees acting as part of their official duties; on a worldwide, perpetual, irrevocable, royalty-free basis to BMJ Publishing Group Ltd ("BMJ") its licensees and where the relevant Journal is co-owned by BMJ to the co-owners of the Journal, to publish the Work in this journal and any other BMJ products and to exploit all rights, as set out in our [licence](#).

The Submitting Author accepts and understands that any supply made under these terms is made by BMJ to the Submitting Author unless you are acting as an employee on behalf of your employer or a postgraduate student of an affiliated institution which is paying any applicable article publishing charge ("APC") for Open Access articles. Where the Submitting Author wishes to make the Work available on an Open Access basis (and intends to pay the relevant APC), the terms of reuse of such Open Access shall be governed by a Creative Commons licence – details of these licences and which [Creative Commons](#) licence will apply to this Work are set out in our licence referred to above.

Other than as permitted in any relevant BMJ Author's Self Archiving Policies, I confirm this Work has not been accepted for publication elsewhere, is not being considered for publication elsewhere and does not duplicate material already published. I confirm all authors consent to publication of this Work and authorise the granting of this licence.

## The effectiveness of interventions to reduce COVID-19 transmission in a large urban jail

Giovanni S. P. Malloy<sup>1</sup>, Lisa B. Puglisi, MD<sup>2,3</sup>, Margaret L. Brandeau, PhD<sup>1</sup>, Tyler D. Harvey, MPH<sup>2</sup>, Emily A. Wang, MD<sup>2</sup>

<sup>1</sup>Department of Management Science and Engineering, School of Engineering, Stanford University, Stanford, CA, USA

<sup>2</sup>Department of Internal Medicine, School of Medicine, Yale University, New Haven, CT, USA

<sup>3</sup>Pain Research, Informatics, Multimorbidities and Education Center, VA Connecticut Healthcare System, West Haven, CT, USA

### Corresponding Author:

Giovanni S. P. Malloy  
475 Via Ortega, Stanford, CA 94305  
315-569-2075  
[malloyg@stanford.edu](mailto:malloyg@stanford.edu)

Abstract word count: 222

Text word count: 3445

## ABSTRACT

**Objectives:** We aim to estimate the impact of various mitigation strategies on COVID-19 transmission in a U.S. jail beyond those offered in national guidelines.

**Design:** We developed a stochastic dynamic transmission model of COVID-19.

**Setting:** One anonymous large urban U.S. jail.

**Participants:** Several thousand staff and incarcerated individuals

**Interventions:** There were four intervention phases during the outbreak: the start of the outbreak, depopulation of the jail, increased proportion of people in single cells, and asymptomatic testing.

**Primary and Secondary Outcome Measures:** The next generation method estimated the basic reproduction ratio,  $R_0$ , in each phase. The fraction of new cases, hospitalizations, and deaths averted by these interventions along with the standard measures of sanitization, masking, and social distancing interventions are reported.

**Results:** For the first outbreak phase, the estimated  $R_0$  was 8.23 (95% CrI: 5.01 to 12.90), and for the subsequent phases,  $R_{0,phase\ 2} = 3.58$  (95% CrI: 2.46 to 5.08),  $R_{0,phase\ 3} = 1.72$  (95% CrI: 1.41 to 2.12), and  $R_{0,phase\ 4} = 0.45$  (95% CrI: 0.32 to 0.59). In total, the jail's interventions prevented approximately 83% of projected cases and hospitalizations and 89% of deaths over 83 days.

**Conclusions:** Depopulation, single celling, and asymptomatic testing within jails can be effective strategies to mitigate COVID-19 transmission in addition to standard public health measures. Decision-makers should prioritize reductions in the jail population, single celling, and testing asymptomatic populations, as additional measures to manage COVID-19 within correctional settings.

**Strengths and limitations of this study**

- COVID-19 has entered hundreds of correctional facilities in the United States, yet we identified only two past empirical studies which are focused on COVID-19 transmission in correctional facilities.
- A stochastic dynamic transmission model describes the spread of COVID-19 in a large urban jail in the United States.
- We calibrated the model to a moving average of the daily incidence of COVID-19 reported by the jail.
- We identified three major interventions – depopulation, single celling, and asymptomatic testing – undertaken by the jail and quantify the reduction in transmission rate as a result of these interventions.

## INTRODUCTION

COVID-19, the disease caused by the SARS-CoV-2 virus, has affected millions of people worldwide, with disproportionate impact on some communities such as those inside correctional facilities. In the United States (U.S.), approximately 2.2 million people are incarcerated in any given day in over 5,000 facilities,<sup>1</sup> where the built environment and activities of daily living make physical distancing exceedingly difficult to implement.<sup>2-4</sup> As of the third week of April 2020, 420 U.S. correctional facilities had at least one diagnosed case of COVID-19, accounting for a total of 4,893 cases among incarcerated individuals and 2,778 cases among staff members.<sup>3</sup> As of June, correctional facilities account for eight out of ten of the largest COVID-19 outbreaks nationally, surpassing nursing homes and food processing plants, and 26 states now have a higher rate of COVID-19 infection in their correctional population than in their general population.<sup>5,6</sup> Cook County Jail currently has one of the largest outbreaks in the country, and the infection rate at Rikers Island is nearly five times that of New York City.<sup>7,8</sup>

Despite the severity of outbreaks in correctional facilities, national guidance surrounding the prevention and management of COVID-19 within such settings has been limited. In the weeks after the first major outbreak in a U.S. jail, the U.S. Centers for Disease Control and Prevention (CDC) published policy guidelines for correctional facilities to help mitigate COVID-19 transmission, which included limiting transfer of incarcerated people between facilities, restricting the number of visitors entering facilities, promoting personal hygiene and environmental sanitization, maximizing the space between those incarcerated (i.e. arranging bunks so individuals sleep head to toe), and screening staff for symptoms.<sup>9</sup>

1  
2  
3 However, CDC guidelines then and still now do not account for the difficulty that many facilities  
4 face in managing COVID-19 and creating physical distance within jails. Even among those jails  
5 which are not crowded, physical distancing is challenging given use of congregate living  
6 arrangements, shared meals, and exercise and recreation programming. In the absence of more  
7 targeted guidelines, there is wide variance in how correctional facilities are managing COVID-  
8 19, especially regarding depopulation efforts that may mitigate COVID-19 and approaches to  
9 testing (symptomatic only vs. asymptomatic, viral testing vs. antibody testing). As an example,  
10 Attorney General Barr has ordered that medically frail individuals in federal prisons be released  
11 to home quarantine, whereas many U.S. state prison systems have no stated policies for larger  
12 scale release. Some correctional systems have implemented systemwide testing of all  
13 incarcerated individuals, including those who are asymptomatic, while others are only testing  
14 those who are symptomatic.  
15  
16  
17  
18  
19  
20  
21  
22  
23  
24  
25  
26  
27  
28  
29  
30  
31  
32

33 The effectiveness of such measures, which fall outside of CDC guidance, in reducing the  
34 transmission of COVID-19 within correctional facilities has yet to be established. In this study,  
35 we estimate the effectiveness of measures to mitigate the spread of COVID-19 beyond standard  
36 CDC recommendations in a large urban jail. We focus on policies with large potential impact for  
37 which there is variability in practice, namely depopulation (cessation of new detentions and  
38 release of incarcerated individuals), single celling (percentage of the total incarcerated  
39 population in a single cell), and testing asymptomatic individuals with the aim of providing  
40 guidance to correctional policymakers and public health agencies.  
41  
42  
43  
44  
45  
46  
47  
48  
49  
50  
51  
52  
53  
54  
55  
56  
57  
58  
59  
60



## METHODS

We developed a stochastic dynamic transmission model of COVID-19 which we calibrated to the outbreak in the jail. We combined data on cases in incarcerated people and correctional staff because they interact very closely and regularly as an ecosystem behind the walls of the jail. We divided the outbreak timeline into four intervention phases marked by the start of the outbreak, start of depopulation efforts, increased single celling, and large-scale asymptomatic testing of incarcerated individuals. We estimated the initial basic reproduction ratio,  $R_0$ , and the effective reproduction ratio,  $R_t$ , in each phase, for the entire jail. We also estimated the fraction of new cases, hospitalizations, and deaths averted by the combined interventions.

### *Model description*

We modified a traditional SEIR model to represent the disease states of COVID-19. These disease states included susceptible ( $S$ ), exposed ( $E$ ), infected symptomatic ( $I_{sym}$ ), infected asymptomatic ( $I_{asym}$ ), quarantined ( $Q$ ), hospitalized ( $H$ ), and recovered ( $Rec$ ) individuals (Figure 1). To model these interacting populations, we developed a mass-action mixing model described by the following equations:

$$\frac{dS}{dt} = bS - \frac{\beta S}{N}(I_{sym} + I_{asym}) \quad (1)$$

$$\frac{dE}{dt} = bE + \frac{\beta S}{N}(I_{sym} + I_{asym}) - \varepsilon E \quad (2)$$

$$\frac{dI_{sym}}{dt} = (1 - \alpha)\varepsilon E - I_{sym} \quad (3)$$

$$\frac{dI_{asym}}{dt} = bI_{asym} + \alpha\varepsilon E - \gamma I_{asym} \quad (4)$$

$$\frac{dQ}{dt} = I_{sym} - (1 - \eta)\gamma Q - \eta\left(\frac{1}{\gamma} - \frac{1}{\mu}\right)^{-1} Q \quad (5)$$

$$\frac{dH}{dt} = \eta \left( \frac{1}{\gamma} - \frac{1}{\mu} \right)^{-1} Q - \mu H \quad (6)$$

$$\frac{dRec}{dt} = (1 - d_I)(1 - \eta)\gamma Q + (1 - d_I)\mu H + \gamma I_{asym} \quad (7)$$

$$\frac{dDead}{dt} = d_I(1 - \eta)\gamma Q + d_I\mu H \quad (8)$$

$$N = S + E + I_{sym} + I_{asym} + Q + H + Rec \quad (9)$$

The susceptible, exposed, and asymptomatic infected populations grew at rate  $b$  which represented the overall growth or reduction in jail population. We assume that symptomatic infected individuals are not removed from the jail during general depopulation and would be admitted directly to quarantine. For the time horizon of the model, the population was generally shrinking. Susceptible individuals were exposed to COVID-19 at transmission rate  $\beta$ . We recalibrated this transmission rate for each of the four outbreak phases. We assumed that asymptomatic and symptomatic infected individuals could transmit the disease.<sup>10 11</sup> Exposed individuals were infected but not yet infectious and become asymptomatic or symptomatic infected at rate  $\varepsilon$ , which corresponded to the incubation period of COVID-19. A certain proportion,  $\alpha$ , of these individuals stayed asymptomatic, while remaining individuals became symptomatic. Based on the jail's report, we assumed that symptomatic infected individuals were identified one day after symptoms presented and placed in quarantine after identification. We assumed that individuals once quarantined did not transmit COVID-19, as they were isolated from the susceptible population. A fraction,  $\eta$ , of quarantined individuals were hospitalized and recovered from hospitalization at rate  $\mu$ . All infected individuals recovered or died at rate  $\gamma$  regardless of symptomatic or asymptomatic status. Symptomatic infected individuals died with probability  $d_I$ .

### *Interventions*

The jail implemented various measures over time in an attempt to mitigate the spread of COVID-19. We divide the outbreak into four intervention phases, corresponding to the initiation of key measures of interest which fell outside the guidance of the CDC. During Phase 1 (days 1-11), the jail implemented a broad array of strategies that were consistent with CDC guidance including: basic screening for flu-like symptoms in incarcerated people; new detainees quarantined for at least 7 days and basic screening for flu-like symptoms for visitors, vendors, attorneys, and community members entering the facility; staff required to report symptoms as well as contact with known COVID-19 positive cases and any travel outside of the U.S.; suspension of all tours, large gatherings, in-person visitation. During phase 2 (days 12-17), the jail population started to decrease by 1.41% each day through a combination of measures which included a marked decrease in new detentions given changes in the court and judicial system procedures and large community organized bail outs (Figure 2). The jail also began taking the temperature of all employees each day. During phase 3 (days 18-36), the jail began increasing the proportion of the population in single-occupancy cells from 26% on day 18 to 54% on day 36. During this period, they began requiring all staff to wear surgical masks and allotted new masks to those incarcerated each day. They also continued to isolate confirmed and suspected COVID-19 cases among incarcerated individuals but given the number of individuals, they identified a different building for segregating patients which provided a larger space for the growing number of confirmed cases. Lastly, they started on-site voluntary testing for employees and a two-week COVID-19 paid leave policy for all employees. During phase 4 (days 37-83), the jail began testing for asymptomatic cases in divisions with high numbers of cases identified during contact tracing at a rate of approximately 50-75 people per day.

### *Model Instantiation and Calibration*

We estimated some model parameter values from previous literature (Table 1). The rate at which exposed individuals became asymptotically or symptomatically infected,  $\epsilon$ , was the inverse of the incubation period. The incubation period of COVID-19 was previously described with a lognormal distribution with mean 5.1 days and standard deviation 0.89 days.<sup>12</sup> We assumed that the proportion of infections that are asymptomatic,  $\alpha$ , was uniformly distributed over the range 0.25 to 0.56.<sup>13 14</sup> The average recovery rate was previously estimated to be 0.1, the inverse of the 10-day mean infection period.<sup>15</sup> We assumed that the infection period followed a truncated normal distribution with mean 10 days, standard deviation 6.25 days, minimum 5 days, and maximum 20 days. Additionally, the length of hospitalization from COVID-19 has been estimated to be 5 days, making the daily recovery probability from the hospital 0.2.<sup>16</sup> We assumed that the length of hospitalization followed a lognormal distribution with a mean of 5 days and standard deviation of 1 day.

The jail provided demographic data about the size of the incarcerated population per day, as well as epidemiological data about confirmed COVID-19 cases over the course of 83 days. We assumed an average reporting delay of six days from first exposure to reported incidence. This accounts for the mean incubation period and a minor delay between symptom onset and COVID-19 test result and isolation. The jail provided data on the age of the infected person, date of positive COVID-19 test, the work or incarceration location of the infected individual, and whether the individual was hospitalized or died as a result of the COVID-19 infection. We used these data to calculate the proportion of symptomatic infections that were hospitalized or died.

1  
2  
3 For each intervention phase, we used the epidemiological data to determine the growth rate,  $b$ , as  
4  
5 the average rate of growth for the entire facility.  
6  
7

8  
9  
10 We calibrated the transmission rate,  $\beta$ , for each intervention phase. We first pseudo-randomly  
11  
12 selected values for parameters  $\varepsilon$ ,  $\alpha$ ,  $\gamma$ , and  $\mu$  based on our assumed distributions (Table 1). Then,  
13  
14 we calculated  $b$  for the intervention phase. To find the best-fitting value of  $\beta$  for the given  
15  
16 parameter set, we implemented an exhaustive search over the range  $[0,4]$  in increments of 0.01.  
17  
18 We chose the value of  $\beta$  which minimized the sum of mean squared error between the reported  
19  
20 daily incidence of confirmed COVID-19 cases among incarcerated people and staff in the jail to  
21  
22 the daily incidence of symptomatic infected cases in the model for that phase. We calculated the  
23  
24 incidence of symptomatic cases using the raw reported incidence before asymptomatic testing.  
25  
26 Select asymptomatic testing for incarcerated people began on day 31 and for staff began on day  
27  
28 21. After asymptomatic testing began, we took the minimum of the jail-provided data on the  
29  
30 number of symptomatic tests multiplied by the average percentage of positive results of  
31  
32 symptomatic tests between days 16-30 (89%) and the raw reported incidence. Based on this  
33  
34 estimate, on average, 82% of the reported daily incidence among the incarcerated population was  
35  
36 symptomatic after asymptomatic testing began. Because we did not have testing data available  
37  
38 for staff, we assumed that 82% of reported new staff cases were symptomatic after on-site testing  
39  
40 became available for staff.  
41  
42  
43  
44  
45  
46  
47  
48

49 We used a simple moving average of the previous five days of incidence to smooth the  
50  
51 calibration targets. We assumed that the reported incidence corresponded to the number of  
52  
53 incarcerated individuals and staff members who showed symptoms of COVID-19. For each  
54  
55  
56  
57

intervention phase, we ran 1,000 Monte Carlo simulations and defined the 95% credible interval of  $\beta$  as the range into which 95% of calibrated values of  $\beta$  fell.

### Calculation of $R_0$ and $R_t$

To calculate  $R_0$  and  $R_t$ , we used the next generation method.<sup>17</sup> This method utilizes two matrices of partial derivatives of compartments with infected individuals.<sup>18</sup> In our model, this included exposed, asymptomatic infected, symptomatic infected, quarantined, and hospitalized individuals. The first matrix,  $F$ , is the rate of appearance of new infections for each compartment. Each element,  $f_{ij}$ , of  $F$  is the partial derivative of any term in which new infections appear in compartment  $i$  with respect to compartment  $j$  where  $i, j \in [E, I_{asym}, I_{sym}, Q, H]$ .

$$F = \begin{matrix} E \\ I_{sym} \\ I_{asym} \\ Q \\ H \end{matrix} \begin{bmatrix} 0 & \frac{\beta S_0}{N} & \frac{\beta S_0}{N} & 0 & 0 \\ 0 & 0 & 0 & 0 & 0 \\ 0 & 0 & 0 & 0 & 0 \\ 0 & 0 & 0 & 0 & 0 \\ 0 & 0 & 0 & 0 & 0 \end{bmatrix} \quad (10)$$

The second matrix,  $V$ , is the rate of transfer of individuals out of a compartment minus the rate of transfer of individuals into a compartment. Therefore, each element,  $v_{ij}$ , of  $V$  is the partial derivative of the additive inverse of any term other than the appearance of new infections in compartment  $i$  with respect to compartment  $j$ . The matrix  $V$  and its inverse are as follows:

$$V = \begin{matrix} E \\ I_{sym} \\ I_{asym} \\ Q \\ H \end{matrix} \begin{bmatrix} \varepsilon - b & 0 & 0 & 0 & 0 \\ -(1 - \alpha)\varepsilon & 1 & 0 & 0 & 0 \\ -\alpha\varepsilon & 0 & \gamma - b & 0 & 0 \\ 0 & -1 & 0 & (1 - \eta)\gamma + \eta\left(\frac{1}{\gamma} - \frac{1}{\mu}\right)^{-1} & 0 \\ 0 & 0 & 0 & -\eta\left(\frac{1}{\gamma} - \frac{1}{\mu}\right)^{-1} & \mu \end{bmatrix} \quad (11)$$

$$V^{-1} = \begin{bmatrix} (\varepsilon - b)^{-1} & 0 & 0 & 0 & 0 \\ \alpha + 1 & 1 & 0 & 0 & 0 \\ \frac{\alpha}{\gamma} & 0 & (\gamma - b)^{-1} & 0 & 0 \\ -\frac{(\alpha + 1)(\gamma - \mu)}{\gamma(\eta - 1) + \mu} & \frac{\mu - \gamma}{\gamma(\eta - 1) + \mu} & 0 & \frac{\mu - \gamma}{\gamma(\eta - 1) + \mu} & 0 \\ \frac{(\alpha + 1)\eta}{\gamma(\eta - 1) + \mu} & \frac{\eta}{\gamma(\eta - 1) + \mu} & 0 & \frac{\eta}{\gamma(\eta - 1) + \mu} & \mu^{-1} \end{bmatrix} \quad (12)$$

The next generation method calculates  $R_0$  as the dominant eigenvalue of the next generation matrix. The next generation matrix is defined as  $FV^{-1}$ :

$$FV^{-1} = \begin{bmatrix} \frac{\beta S_0(\alpha + 1)}{N} + \frac{\alpha \beta S_0}{\gamma N} & \frac{\beta S_0}{N} & \frac{\beta S_0}{(\gamma - b)N} & 0 & 0 \\ 0 & 0 & 0 & 0 & 0 \\ 0 & 0 & 0 & 0 & 0 \\ 0 & 0 & 0 & 0 & 0 \end{bmatrix} \quad (13)$$

In our model,  $FV^{-1}$  has only one nonzero eigenvalue,  $\lambda = \frac{-\beta S_0(b - \gamma)(\alpha\gamma + \alpha + \gamma)}{\gamma N(\gamma - b)}$ . Therefore,  $R_0 = \max(0, \lambda)$ , and since  $\lambda \geq 0$ ,  $R_0 = \lambda$ . Since  $R_0$  is directly proportional to  $\beta$ , we can calculate the values of  $R_0$  of other phases simply by using phase 1 starting conditions combined with the reduced transmission rate.

To find the effective reproduction ratio,  $R_t$ , at time  $t$ , we used the next generation method with the same matrices but updated the values of  $S$  and  $\beta$  as appropriate. Because the number of susceptible individuals,  $S$ , is a function of time, we recalculate  $R_t$  each day. The functional form of  $R_t$  for our model is as follows:

$$R_t = \frac{-\beta S_t(b - \gamma)(\alpha\gamma + \alpha + \gamma)}{\gamma N(\gamma - b)} \quad (14)$$

We computed the 95% credible interval of  $R_t$  as the range into which 95% of calibrated values of  $R_t$  fell. This study was deemed exempt from IRB review by the Yale Human Investigation Committee as we received completely anonymized data from the jail.

### *Role of the funding source*

The funding sources had no role in the study design, collection, analysis, and interpretation of data, writing the report, nor the decision to submit the paper for publication.

## **RESULTS**

Daily reported incidence of COVID-19 in the jail was highly variable, ranging from 0 to 67. The mean absolute error of the model compared to the simple moving average was 19% (Figure 3).

### *Transmission Rates*

In following the initial CDC recommendations for correctional facilities (phase 1), the baseline transmission rate ( $\beta$ ) was 1.89 (95% Credible Interval (CrI): 1.44-2.44) (Figure 4). After depopulation began (phase 2), the transmission rate was  $\beta = 0.83$  (95% CrI: 0.66-1.06). This represents a 56% decrease in the transmission rate from phase 1. After the increase in single-occupancy cells (phase 3), the transmission rate was  $\beta = 0.41$  (95% CrI: 0.30-0.56), a 51% decrease from phase 2. Finally, the transmission rate after testing of asymptomatic individuals began (phase 4) was  $\beta = 0.11$  (95% CrI: 0.06-0.20), a 73% decrease from phase 3. All of these reductions are statistically significant.

### *Reproduction Ratios*

The estimated value of  $R_0$  was highest in phase 1, during the first 11 days of the outbreak (Table 2). For this phase, we estimate  $R_0 = 8.23$  (95% CrI: 5.01-12.90) (Table 2). We estimate  $R_0$  of each phase in a completely susceptible population as if the outbreak had begun with the values for  $\beta$  which correspond to each phase:  $R_{0,phase 2} = 3.58$  (95% CrI: 2.46-5.08),  $R_{0,phase 3} = 1.72$



1  
2  
3 (95% CrI: 1.41-2.12), and  $R_{0,phase\ 4} = 0.45$  (95% CrI: 0.32-0.59). The effective reproduction  
4  
5 ratio,  $R_t$ , decreased over time as the susceptible population shrank, the transmission rate  
6  
7 changed, and different interventions were implemented (Figure 5). For the entire jail, we  
8  
9 estimate that the interventions may have reduced the effective reproduction ratio  $R_t$  below 1  
10  
11 about five weeks after the outbreak began (on day 37).  
12  
13  
14  
15

### 16 17 *Averted Infections, Hospitalizations, and Deaths*

18  
19 Table 2 shows the expected total symptomatic cases on day 83 and expected total cases on day  
20  
21 200, assuming that the estimated transmission rate for a particular outbreak phase holds over all  
22  
23 subsequent days. Over the first 83 days of the outbreak, the jail reported 778 symptomatic cases  
24  
25 among incarcerated individuals and staff. Our model predicts 642 symptomatic cases (95% CrI:  
26  
27 592-692), 90 hospitalizations (95% CrI: 83-97), and 4 deaths (95% CrI: 3.6-4.1) over this same  
28  
29 time period (Figure 6). Our estimate is 17% less than the number of reported cases that were  
30  
31 symptomatic. Compared to what could have happened with only the implemented CDC  
32  
33 recommended interventions of phase one, the model predicts a reduction of over 3,200  
34  
35 symptomatic cases, 450 hospitalizations, and 30 deaths over 83 days. This suggests that the  
36  
37 combination of interventions (depopulation, increased single celling, and large-scale  
38  
39 asymptomatic testing of incarcerated individuals) in addition to standard CDC COVID-19  
40  
41 mitigation strategies led to an 83% reduction in predicted symptomatic cases and hospitalizations  
42  
43 and an 89% reduction in predicted deaths.  
44  
45  
46  
47  
48  
49  
50

## 51 **DISCUSSION**

### 52 53 *Principal findings*

1  
2  
3 Using a stochastic compartmental model, we estimate that depopulation efforts, single celling  
4 and asymptomatic testing are important interventions, in addition to those recommended by the  
5 CDC to reduce COVID-19 transmission in jails. We estimate that the actions taken by the jail  
6  
7 reduced potential new cases by approximately 83% over 83 days, and this may have averted over  
8  
9 450 hospitalization and 30 deaths among those who work and live in jails.  
10  
11  
12  
13

### 14 *Policy Implications*

15  
16 Given these findings, depopulation efforts should be a primary strategy for COVID-19  
17 mitigation in jails. Reductions in detained populations to prevent disease transmission is best  
18  
19 achieved by both decreasing the number of new intakes and increasing the number of releases.  
20  
21 This requires that authorities that control jail admissions (including police departments, judges,  
22  
23 and in some cases correctional departments) and jail releases (including judges, lawyers and  
24  
25 community bail funds) both focus on promoting depopulation efforts to mitigate COVID-19  
26  
27 transmission.  
28  
29  
30  
31  
32  
33  
34

35 Our data also suggest that jails should focus on single celling to mitigate COVID-19. To be clear,  
36  
37 single celling does not imply solitary confinement but rather placing one person in a 6 x 9-foot  
38  
39 cell to increase physical distancing in correctional facilities.<sup>19</sup> Given physical crowding in many  
40  
41 facilities is difficult, even when overall incarcerated populations are at record lows, increasing  
42  
43 access to single-occupancy cells will not be feasible without depopulation efforts, and as  
44  
45 supported by our model, will not lead to a contained transmission rate alone. Facilities unable to  
46  
47 appropriately place individuals in single cell without relying on solitary confinement should  
48  
49 consider depopulation as a preferred strategy. Implementing all of these measures will require  
50  
51 interagency coordination to achieve the full public health impact. Further, by enacting these  
52  
53  
54  
55  
56  
57  
58  
59  
60

1  
2  
3 measures, correctional facilities may contribute to managing transmission in the surrounding  
4 community as well, as several recent studies have documented jails as drivers of community  
5 spread of COVID-19.<sup>20 21</sup>  
6  
7  
8  
9

10  
11  
12 Lastly, asymptomatic testing is an important component to COVID-19 mitigation strategies. In  
13 this jail, they focused on asymptomatic testing through contact tracing of people who tested  
14 positive, but much more research needs to be conducted on who should be tested and under what  
15 circumstances, including whether mass testing is effective, when individuals should be tested  
16 (upon entry, upon release, only for contact tracing, or in regular intervals), and whether certain  
17 community rates should guide whether asymptomatic people warrant testing in corrections.  
18  
19

20  
21  
22 While widespread asymptomatic testing may not be indicated in a jail without community cases,  
23 when community cases are present, asymptomatic testing should be strongly recommended.  
24  
25

26  
27 National and international health agencies, such as the CDC and the World Health Organization,  
28 should address depopulation, single celling, and asymptomatic testing in future guidance for  
29 detention facilities and how best to implement these measures. Correctional facility  
30 administrators will need to also consider how to best mitigate the challenges that come with any  
31 of these strategies. For example, coordination of health care and social services organizations  
32 prior to release should be prioritized and considerations of testing when releasing individuals as  
33 part of depopulation efforts.<sup>4</sup>  
34  
35  
36  
37

### 38 *Limitations*

39  
40 Our analysis has several limitations. We used a compartmental model which assumes  
41 homogeneous mixing among the entire population. Correctional facilities in reality do not exhibit  
42 homogeneous mixing, especially across divisions. Our model does not have the granularity to  
43  
44  
45  
46  
47  
48  
49  
50  
51  
52  
53  
54  
55  
56  
57  
58  
59  
60

1  
2  
3 capture the influence of individuals on transmission dynamics. Our model assumes a relatively  
4 stationary population and only accounts for mixing within the jail. In reality, jail populations are  
5 highly variable with frequent intakes and releases. Jailed individuals also have variable daily  
6 routines, such as where they eat or exercise, which are not accounted for in our model. We did  
7 not account for possible false positives, misdiagnosis, overreporting, or underreporting in the  
8 dataset. Finally, the many interventions undertaken by the jail make it difficult to determine the  
9 causal influence of any one particular intervention.  
10  
11  
12  
13  
14  
15  
16  
17  
18  
19  
20

21 Importantly, these limitations influence our estimates of  $\beta$  and  $R_0$ . We model the jail as a closed  
22 system and thus neglect exogenous infection (e.g., staff or new intake incarcerated individuals  
23 who contracted the disease in the community) that likely entered the jail before large-scale  
24 testing efforts. Because our analysis assumed that all new infections arise from internal  
25 transmission, we likely overestimate the true values of  $\beta$  and  $R_0$ , particularly in the early phases  
26 of the epidemic in the jail. Thus, conclusions resulting from our analysis should focus on the  
27 relative reductions of  $\beta$  and  $R_0$  rather than the precise estimates of these values.  
28  
29  
30  
31  
32  
33  
34  
35  
36  
37

### 38 *Conclusions*

39  
40 Despite the limitations of our analysis, we conclude that it is possible to mitigate the spread of  
41 COVID-19 even in correctional settings, where standard social distancing practices are difficult  
42 to achieve, by implementing depopulation strategies, promoting increased single celling, and  
43 asymptomatic testing with appropriate isolation. The large estimated reduction in the  
44 transmission rate ( $\geq 50\%$ ) from these three intervention strategies is comparable to standard  
45 social distancing measures in a community setting.<sup>22</sup> As states and the federal government are  
46 focused on re-opening economies, strategies should be devised to protect those who are  
47  
48  
49  
50  
51  
52  
53  
54  
55  
56  
57

1  
2  
3 incarcerated and those who work in corrections by further limiting population increases so that  
4  
5 future outbreaks are averted.  
6  
7  
8  
9

### 10 **Declaration of interests**

11 All authors have completed the ICMJE uniform disclosure form at  
12  
13 [www.icmje.org/coi\\_disclosure.pdf](http://www.icmje.org/coi_disclosure.pdf) and declare: no support from any organization for the  
14  
15 submitted work; no financial relationships with any organizations that might have an interest in  
16  
17 the submitted work in the previous three years; no other relationships or activities that could  
18  
19 appear to have influenced the submitted work.  
20  
21  
22  
23

### 24 **Contributions**

25  
26 GM contributed to model design, creation, and implementation, data analysis and manipulation,  
27  
28 analysis of results, figure creation, and writing. LP contributed to writing, editing, data  
29  
30 collection, study design, and literature review. MB contributed to model design, writing, and  
31  
32 editing. TH contributed to writing, editing, and literature search. EW contributed to writing,  
33  
34 editing, data collection, study design, and literature search.  
35  
36  
37

### 38 **Transparency declaration**

39  
40 G.M. affirms that this manuscript is an honest, accurate, and transparent account of the study  
41  
42 being reported; that no important aspects of the study have been omitted; and that any  
43  
44 discrepancies from the study as planned (and, if relevant, registered) have been explained.  
45  
46

### 47 **Acknowledgments**

48  
49 We acknowledge the anonymous jail for their prompt collaboration and transparency in  
50  
51 providing detailed data on COVID-19 transmission. At the time that this work was conducted,  
52  
53 G.M. was supported by grant number T32HS026128 from the Agency for Healthcare Research  
54  
55  
56  
57

1  
2  
3 and Quality and L.P. was partially supported by the Veterans Health Administration. The content  
4  
5 is solely the responsibility of the authors and does not necessarily represent the policy or views  
6  
7 of the Agency of Healthcare Research and Quality, the Veterans Health Administration or the  
8  
9 United States Government.  
10

### 11 **Data Sharing Statement**

12  
13  
14 Whenever possible, in accordance with previously signed data usage agreements, we will make  
15  
16 the data used in this study available upon reasonable request to GM.  
17  
18  
19  
20  
21  
22  
23  
24  
25  
26  
27  
28  
29  
30  
31  
32  
33  
34  
35  
36  
37  
38  
39  
40  
41  
42  
43  
44  
45  
46  
47  
48  
49  
50  
51  
52  
53  
54  
55  
56  
57  
58  
59  
60

## Figures

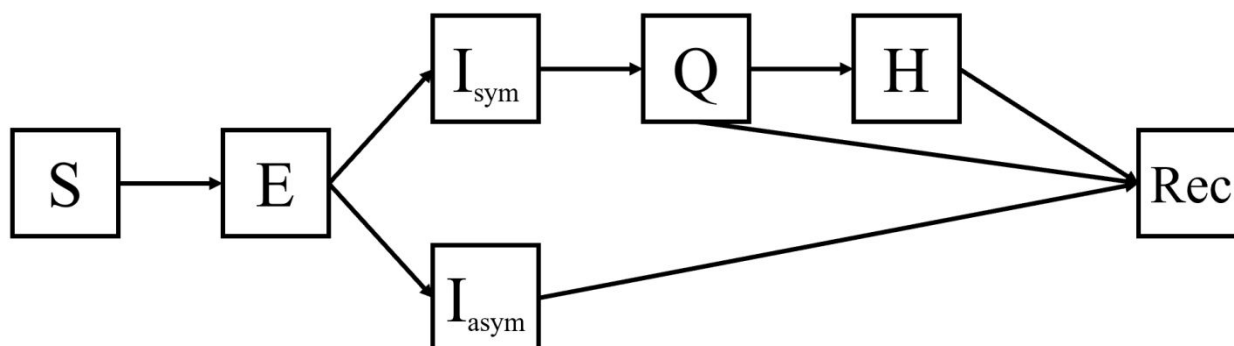

Figure 1. Structure of the disease transmission model. These disease states included susceptible ( $S$ ), exposed ( $E$ ), infected symptomatic ( $I_{sym}$ ), infected asymptomatic ( $I_{asym}$ ), quarantined ( $Q$ ), hospitalized ( $H$ ), and recovered ( $Rec$ ) individuals.

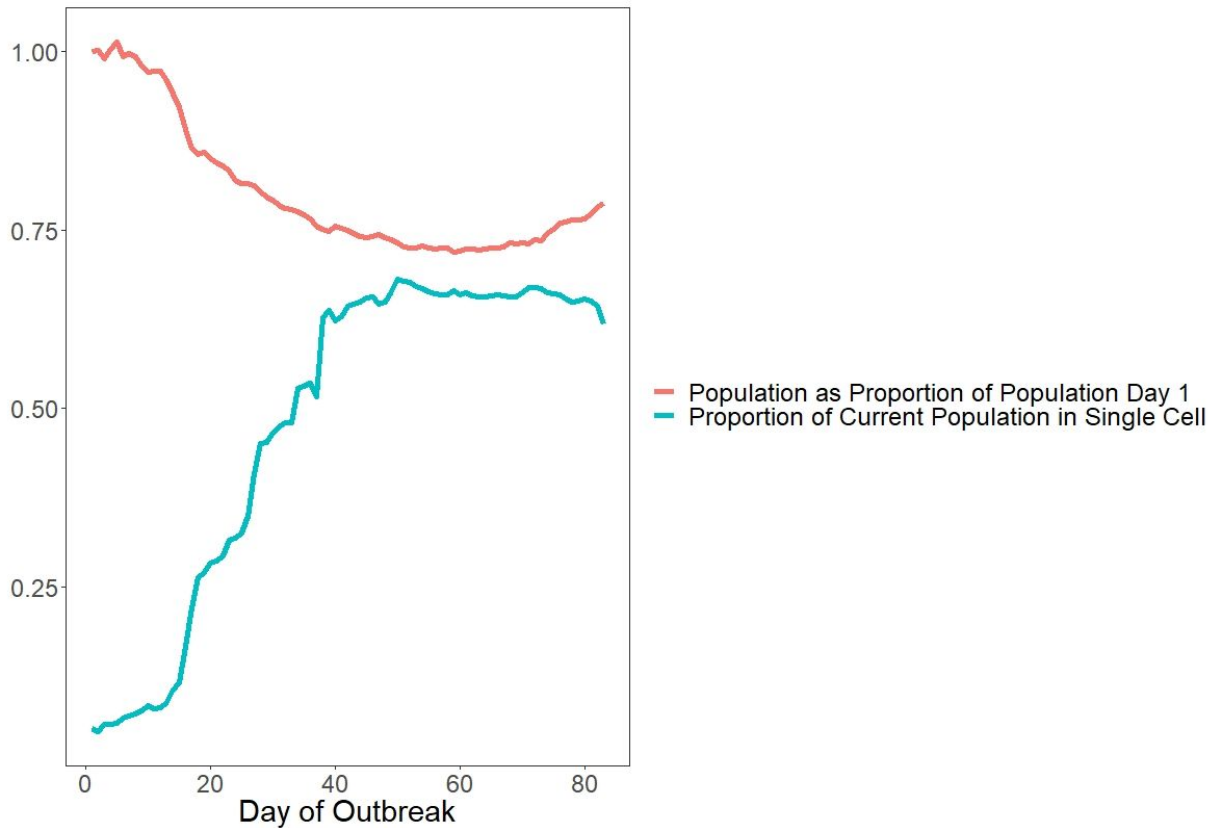

Figure 2. Change in the total population of the jail and the portion of the population in single-occupancy cells over the course of the outbreak. As depopulation increases, the overall population as a proportion of the population on day 1 of the outbreak decreases. Additionally, the proportion of incarcerated people in single-occupancy cells increases over time.



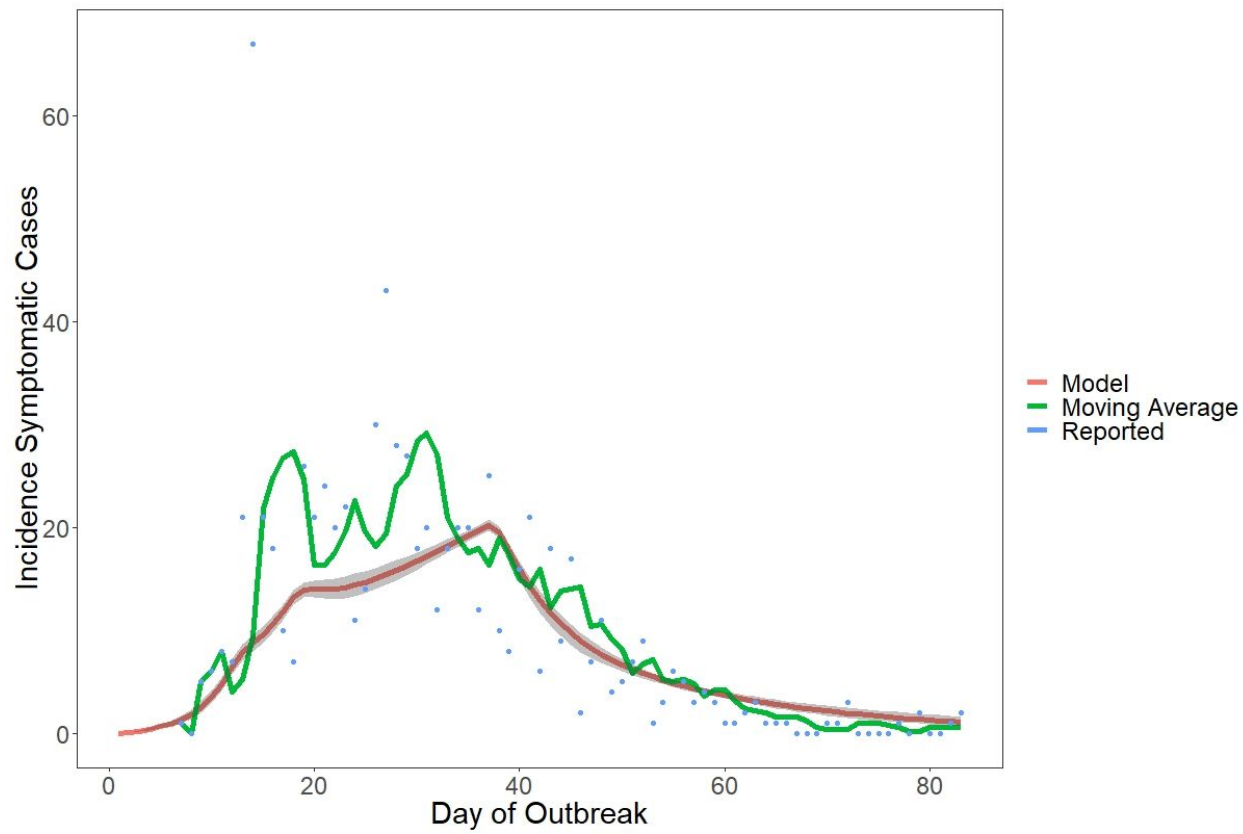

Figure 3. Comparison of the incidence of symptomatic cases in the model with reported COVID-19 incidence at the jail.

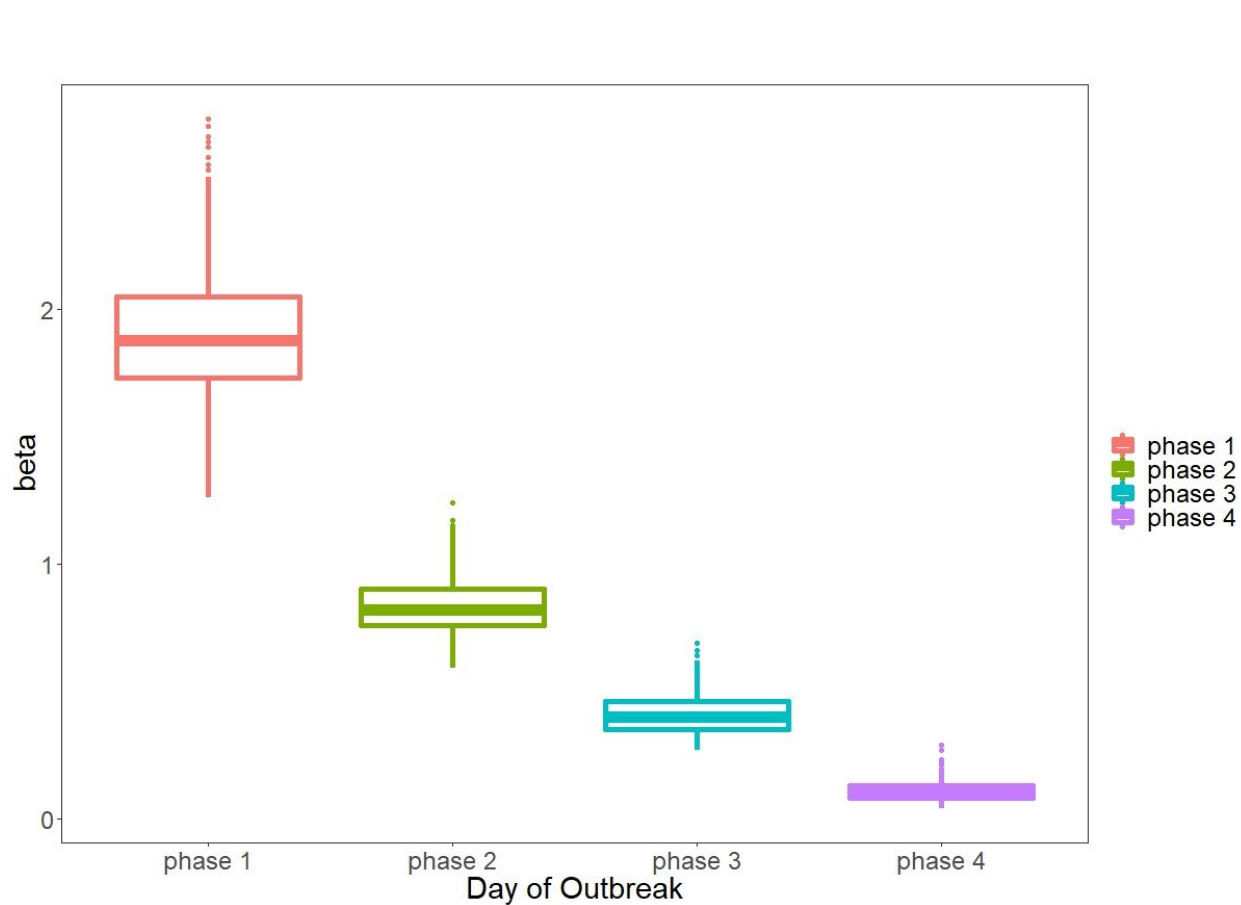

Figure 4. Calibrated values of the transmission rate  $\beta$  for different outbreak phases (Phase 1: initial outbreak, Phase 2: depopulation began, Phase 3: increased single celling, Phase 4: widespread testing of asymptomatic incarcerated individuals).

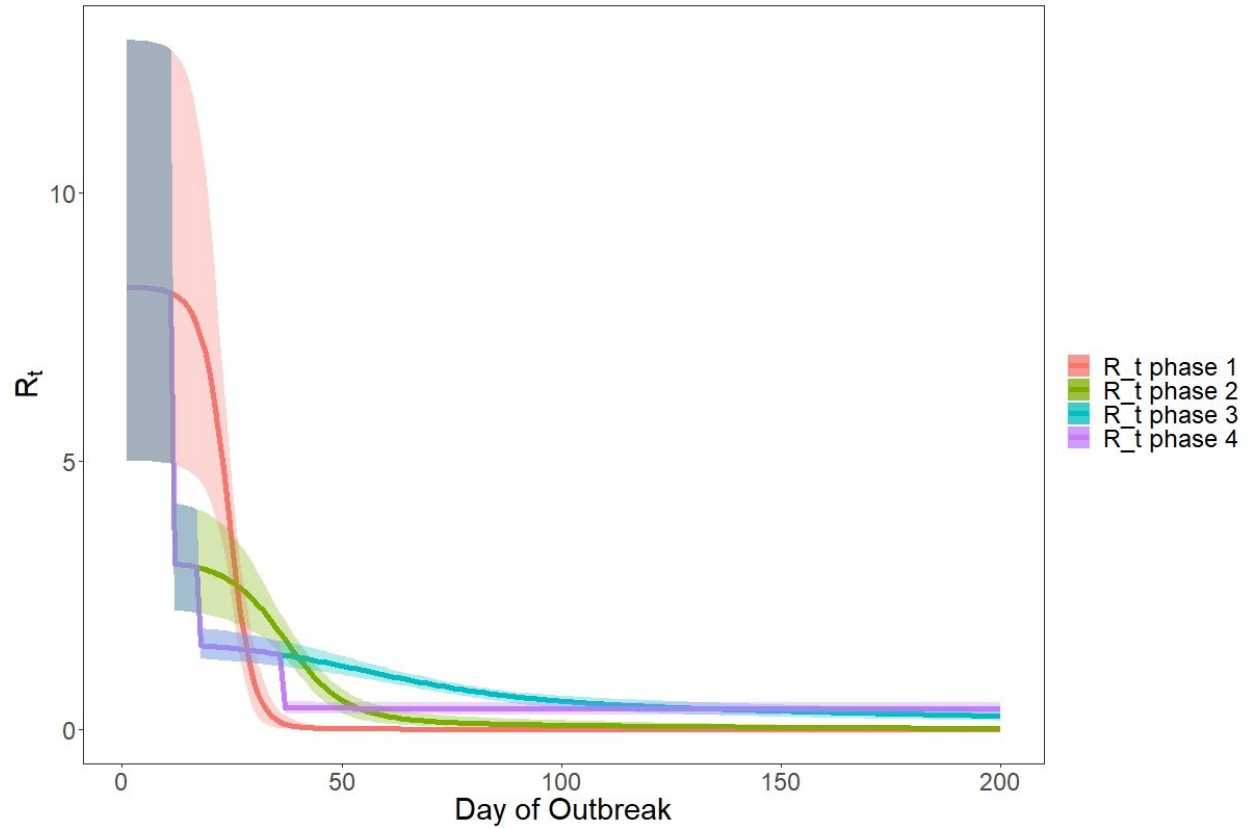

Figure 5. Calculated values of the effective reproduction ratio  $R_t$  for all intervention phases (Phase 1: initial outbreak, Phase 2: depopulation began, Phase 3: increased single celling, Phase 4: widespread testing of asymptomatic incarcerated individuals).

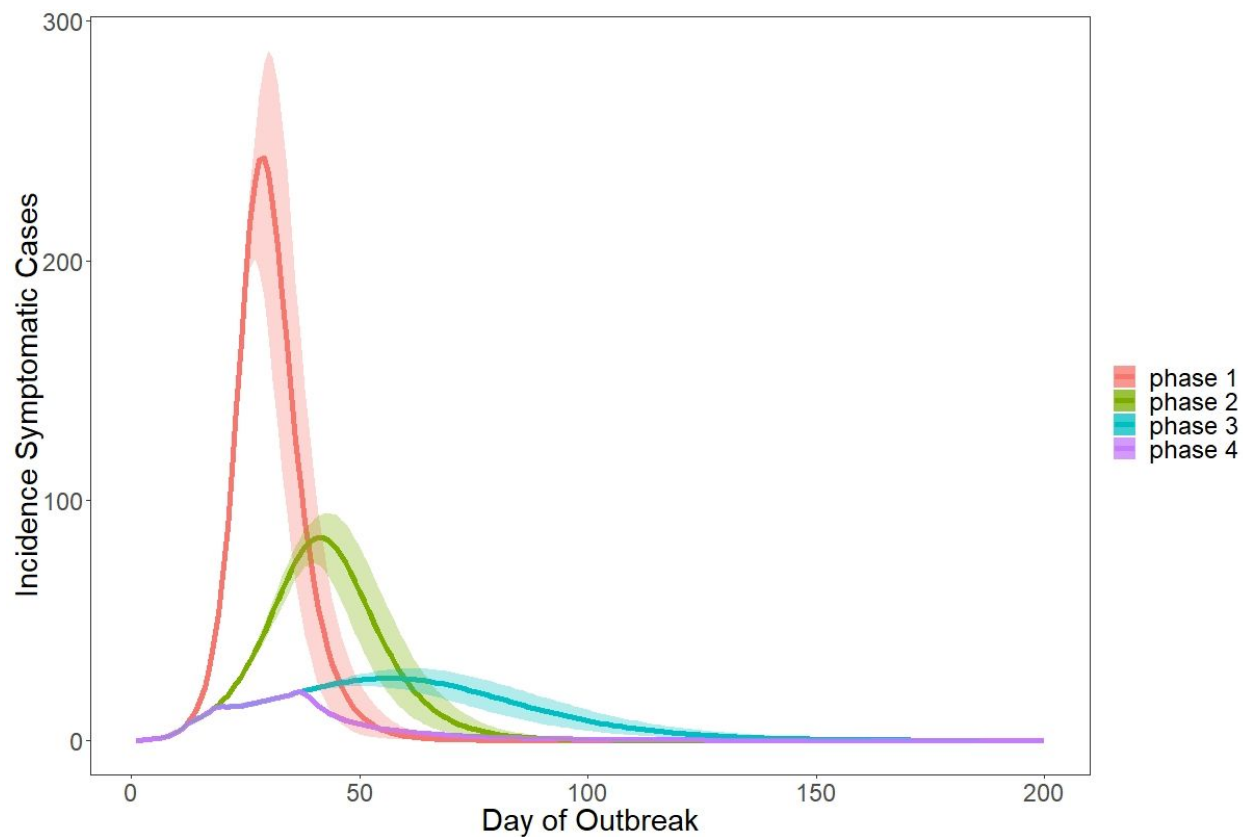

Figure 6. Projected incidence of symptomatic cases for all intervention phases (Phase 1: initial outbreak, Phase 2: depopulation began, Phase 3: increased single celling, Phase 4: widespread testing of asymptomatic incarcerated individuals).

Table 1. Parameter Estimates

| Name          | Description                                                | Value                                                                               | Source       |
|---------------|------------------------------------------------------------|-------------------------------------------------------------------------------------|--------------|
| $b$           | Net rate of entrance into the jail, phase 1 [1/day]        | -0.004                                                                              | Jail dataset |
|               | Net rate of entrance into the jail, phase 2 [1/day]        | -0.0141                                                                             |              |
|               | Net rate of entrance into the jail, phase 3 [1/day]        | -0.0076                                                                             |              |
|               | Net rate of entrance into the jail, phase 4 [1/day]        | 0.0005                                                                              |              |
| $\beta$       | Transmission rate [1/day]                                  |                                                                                     | Calibrated   |
| $\varepsilon$ | Incubation period <sup>1</sup> [1/day]                     | 0.18                                                                                | 12           |
|               |                                                            | Incubation period: <i>Lognormal</i> (5.1, 0.89)                                     |              |
| $\alpha$      | Proportion of cases that are asymptomatic                  | 0.405                                                                               | 13 14        |
|               |                                                            | <i>uniform</i> (0.25, 0.56)                                                         |              |
| $\gamma$      | Recovery rate [1/day]                                      | 0.1                                                                                 | 15 16        |
|               |                                                            | Infection period:<br><i>Truncated N</i> (10, 6.25, <i>min</i> = 5, <i>max</i> = 20) |              |
| $\eta$        | Proportion of symptomatic infections that are hospitalized | 0.14                                                                                | Jail dataset |
| $\lambda$     | Recovery rate from hospital [1/day]                        | 0.2                                                                                 | 16           |
|               |                                                            | Length of hospitalization: <i>Lognormal</i> (5,1)                                   |              |

**Table 2. Intervention Effects: Estimated Transmission Rates ( $\beta$ ), Effective Reproduction Ratios ( $R_0$ ), and Disease Cases for each Outbreak Phase**

| Phase                                                          | Time Range in Days | $\beta$<br>(95% CrI)  | $R_0$<br>(95% CrI)     | Reduction in $\beta$ and $R_0$ from Previous Phase | Expected Total Symptomatic Cases, Day 83*<br>(95% CrI) | Expected Total Hospitalizations, Day 83*<br>(95% CrI) | Expected Total Deaths, Day 83*<br>(95% CrI) | Expected Total Cases, Day 200*<br>(95% CrI) |
|----------------------------------------------------------------|--------------------|-----------------------|------------------------|----------------------------------------------------|--------------------------------------------------------|-------------------------------------------------------|---------------------------------------------|---------------------------------------------|
| 1: Initial outbreak                                            | 1 – 11             | 1.89<br>(1.44 - 2.44) | 8.25<br>(5.01 - 12.90) |                                                    | 3,867<br>(2,742 - 5,044)                               | 541<br>(384 - 706)                                    | 38<br>(29 - 47)                             | 6,372<br>(6,318 - 6,437)                    |
| 2: Depopulation                                                | 12 – 17            | 0.83<br>(0.66 - 1.06) | 3.58<br>(2.46 - 5.08)  | 56%                                                | 2,520<br>(1,940 - 3,088)                               | 353<br>(272 - 432)                                    | 24<br>(20 - 28)                             | 4,055<br>(3,666 - 4,294)                    |
| 3: Increased single celling                                    | 18 – 36            | 0.41<br>(0.30 - 0.56) | 1.72<br>(1.41 - 2.12)  | 51%                                                | 1,447<br>(1,224 - 1,654)                               | 203<br>(171 - 232)                                    | 12<br>(11 - 13)                             | 2,950<br>(2,331 - 3,521)                    |
| 4: Widespread testing of asymptomatic incarcerated individuals | 37 – 83            | 0.11<br>(0.06 - 0.20) | 0.45<br>(0.32 - 0.59)  | 73%                                                | 642<br>(592 - 692)                                     | 90<br>(83 - 97)                                       | 3.9<br>(3.6 - 4.1)                          | 1,121<br>(904 - 1,433)                      |

\* Assuming the value of  $\beta$  estimated for this intervention phase occurs during all subsequent days.

## REFERENCES

1. Kaeble D, Cowhig, M. Correctional Populations in the United States. Washington, DC: U.S. Department of Justice, Bureau of Justice Statistics 2018.
2. Hawks L, Woolhandler S, McCormick D. COVID-19 in prisons and jails in the United States. *JAMA Intern Med* 2020;Epub ahead of print doi: 10.1001/jamainternmed.2020.1856 [published Online First: Apr 29]
3. Wallace M, Hagan L, Curran KG, et al. COVID-19 in correctional and detention facilities - United States, February-April 2020. *MMWR Morb Mortal Wkly Rep* 2020;69(19):587-90. doi: 10.15585/mmwr.mm6919e1 [published Online First: 2020/05/15]
4. Kinner SA, Young JT, Snow K, et al. Prisons and custodial settings are part of a comprehensive response to COVID-19. *Lancet Public Health* 2020;5(4):e188-e89. doi: 10.1016/S2468-2667(20)30058-X [published Online First: 2020/03/21]
5. McCauley E. COVID Case Watch June 3, 2020 2020 [Available from: <https://covidprisonproject.com/blog/2020>].
6. The New York Times. Coronavirus in the U.S.: Latest map and case count. *New York Times* 2020.
7. Williams T, Ivory D. Coronavirus behind bars: Cook County Jail is top U.S. hot spot. *New York Times* 2020 Apr 8.
8. The Legal Aid Society. COVID-19 infection tracking in NYC jails 2020 [Available from: <https://legalaidnyc.org/covid-19-infection-tracking-in-nyc-jails/> accessed Apr 24 2020].
9. Centers for Disease Control and Prevention. Interim guidance on management of Coronavirus Disease 2019 (COVID-19) 2020 [Available from: <https://www.cdc.gov/coronavirus/2019-ncov/downloads/guidance-correctional-detention.pdf>].
10. Wei WE, Li Z, Chiew CJ, et al. Presymptomatic transmission of SARS-CoV-2 - Singapore, January 23-March 16, 2020. *MMWR Morb Mortal Wkly Rep* 2020;69(14):411-15. doi: 10.15585/mmwr.mm6914e1 [published Online First: 2020/04/10]
11. Bai Y, Yao L, Wei T, et al. Presumed asymptomatic carrier transmission of COVID-19. *JAMA* 2020;Epub ahead of print doi: 10.1001/jama.2020.2565 [published Online First: 2020/02/23]
12. Lauer SA, Grantz KH, Bi Q, et al. The incubation period of Coronavirus disease 2019 (COVID-19) from publicly reported confirmed cases: estimation and application. *Ann Intern Med* 2020;172(9):577-82. doi: 10.7326/M20-0504 [published Online First: 2020/03/10]
13. Oran DP, Topol EJ. Prevalence of asymptomatic SARS-CoV-2 infection: a narrative review. *Ann Intern Med* 2020;Epub ahead of print doi: 10.7326/M20-3012 [published Online First: 2020/06/04]
14. Arons MM, Hatfield KM, Reddy SC, et al. Presymptomatic SARS-CoV-2 infections and transmission in a skilled nursing facility. *N Engl J Med* 2020;382(22):2081-90. doi: 10.1056/NEJMoa2008457 [published Online First: 2020/04/25]
15. Rocklov J, Sjodin H, Wilder-Smith A. COVID-19 outbreak on the Diamond Princess cruise ship: estimating the epidemic potential and effectiveness of public health countermeasures. *J Travel Med* 2020;Epub ahead of print doi: 10.1093/jtm/taaa030
16. Thevarajan I, Nguyen THO, Koutsakos M, et al. Breadth of concomitant immune responses prior to patient recovery: a case report of non-severe COVID-19. *Nat Med*

- 1  
2  
3 2020;26(4):453-55. doi: 10.1038/s41591-020-0819-2 [published Online First:  
4 2020/04/15]  
5  
6 17. Diekmann O, Heesterbeek JA, Metz JA. On the definition and the computation of the basic  
7 reproduction ratio  $R_0$  in models for infectious diseases in heterogeneous populations. *J*  
8 *Math Biol* 1990;28(4):365-82. doi: 10.1007/BF00178324 [published Online First:  
9 1990/01/01]  
10  
11 18. Heffernan JM, Smith RJ, Wahl LM. Perspectives on the basic reproductive ratio. *J R Soc*  
12 *Interface* 2005;2(4):281-93. doi: 10.1098/rsif.2005.0042 [published Online First:  
13 2006/07/20]  
14  
15 19. Cloud D, Augustine, D., Ahalt, C., Williams, B. The Ethical Use of Medical Isolation - Not  
16 Solitary Confinement - to Reduce COVID-19 Transmission in Correctional Settings:  
17 AMEND, 2020.  
18  
19 20. Reinhart E, Chen D. Incarceration and its disseminations: COVID-19 pandemic lessons from  
20 Chicago's Cook County Jail. *Health Aff (Millwood)* 2020;Epub ahead of print doi:  
21 10.1377/hlthaff.2020.00652 [published Online First: 2020/06/05]  
22  
23 21. Lofgren E, Lum K, Horowitz A, et al. The epidemiological implications of incarceration  
24 dynamics in jails for community, corrections officer, and incarcerated population risks  
25 from COVID-19 2020 [Available from:  
26 <https://www.medrxiv.org/content/10.1101/2020.04.08.20058842v2.full.pdf>.  
27  
28 22. Lewnard JA, Lo NC. Scientific and ethical basis for social-distancing interventions against  
29 COVID-19. *Lancet Infect Dis* 2020;20(6):631-33. doi: 10.1016/S1473-3099(20)30190-0  
30 [published Online First: 2020/03/28]  
31  
32  
33  
34  
35  
36  
37  
38  
39  
40  
41  
42  
43  
44  
45  
46  
47  
48  
49  
50  
51  
52  
53  
54  
55  
56  
57  
58  
59  
60



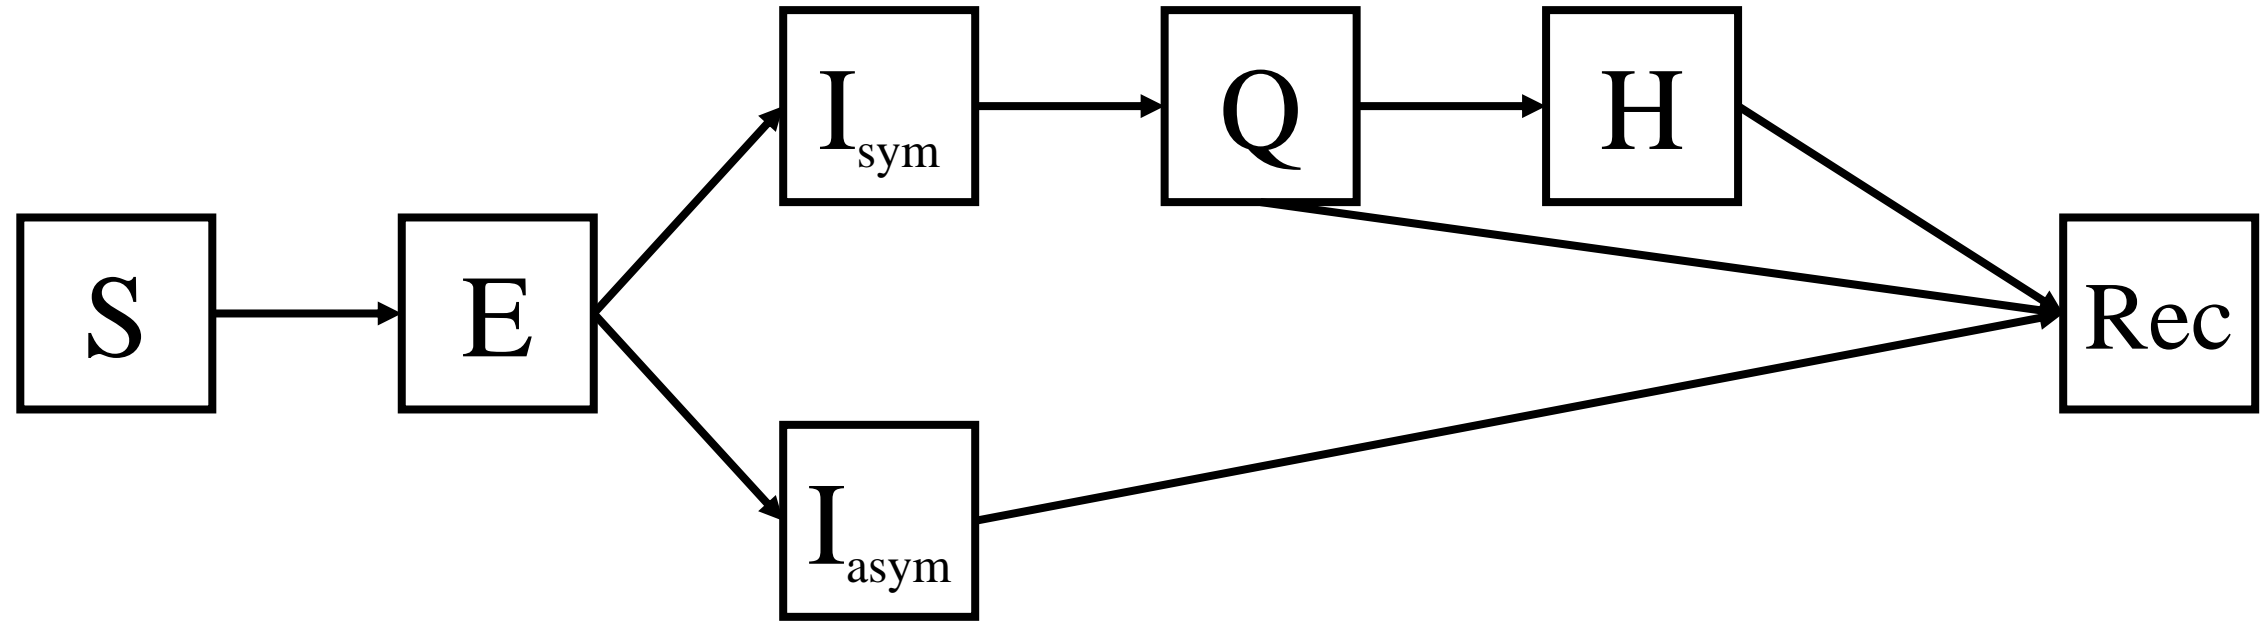

1  
2  
3  
4  
5  
6  
7  
8  
9  
10  
11  
12  
13  
14  
15  
16  
17  
18  
19  
20  
21  
22  
23  
24  
25  
26  
27  
28  
29  
30  
31  
32  
33  
34  
35  
36  
37  
38  
39  
40  
41

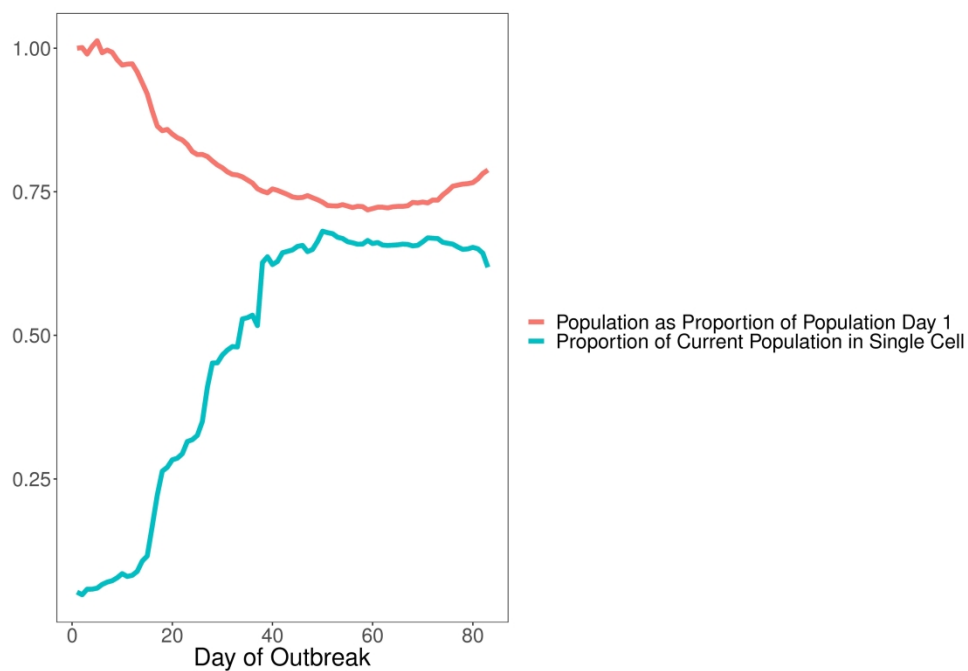

Figure 2. Change in the total population of the jail and the portion of the population in single-occupancy cells over the course of the outbreak. As depopulation increases, the overall population as a proportion of the population on day 1 of the outbreak decreases. Additionally, the proportion of incarcerated people in single-occupancy cells increases over time.

317x211mm (300 x 300 DPI)

1  
2  
3  
4  
5  
6  
7  
8  
9  
10  
11  
12  
13  
14  
15  
16  
17  
18  
19  
20  
21  
22  
23  
24  
25  
26  
27  
28  
29  
30  
31  
32  
33  
34  
35  
36  
37  
38  
39  
40  
41  
42  
43  
44  
45  
46  
47  
48  
49  
50  
51  
52  
53  
54  
55  
56  
57  
58  
59  
60

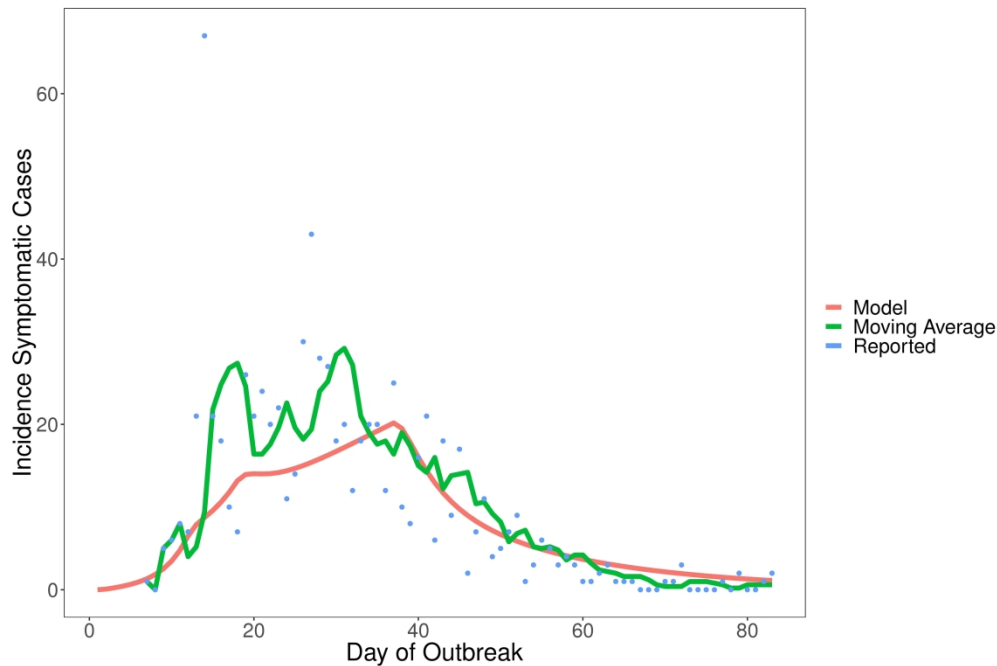

Figure 3. Comparison of the incidence of symptomatic cases in the model with reported COVID-19 incidence at the jail.

317x211mm (300 x 300 DPI)

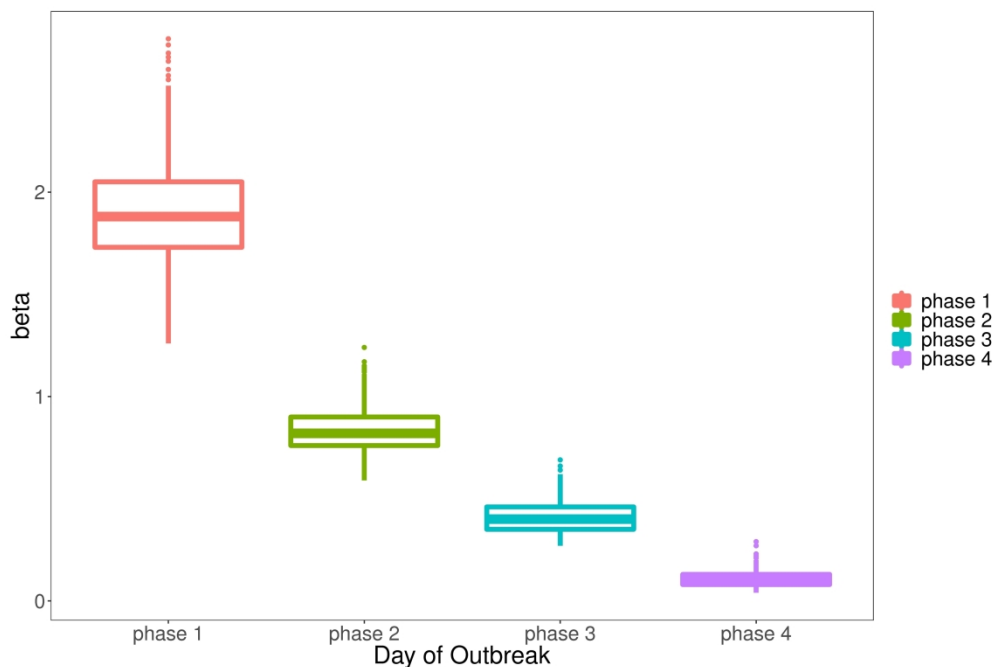

Figure 4. Calibrated values of the transmission rate  $\beta$  for different outbreak phases (Phase 1: initial outbreak, Phase 2: depopulation began, Phase 3: increased single celling, Phase 4: widespread testing of asymptomatic incarcerated individuals).

317x211mm (300 x 300 DPI)

1  
2  
3  
4  
5  
6  
7  
8  
9  
10  
11  
12  
13  
14  
15  
16  
17  
18  
19  
20  
21  
22  
23  
24  
25  
26  
27  
28  
29  
30  
31  
32  
33  
34  
35  
36  
37  
38  
39  
40  
41  
42  
43  
44  
45  
46  
47  
48  
49  
50  
51  
52  
53  
54  
55  
56  
57  
58  
59  
60

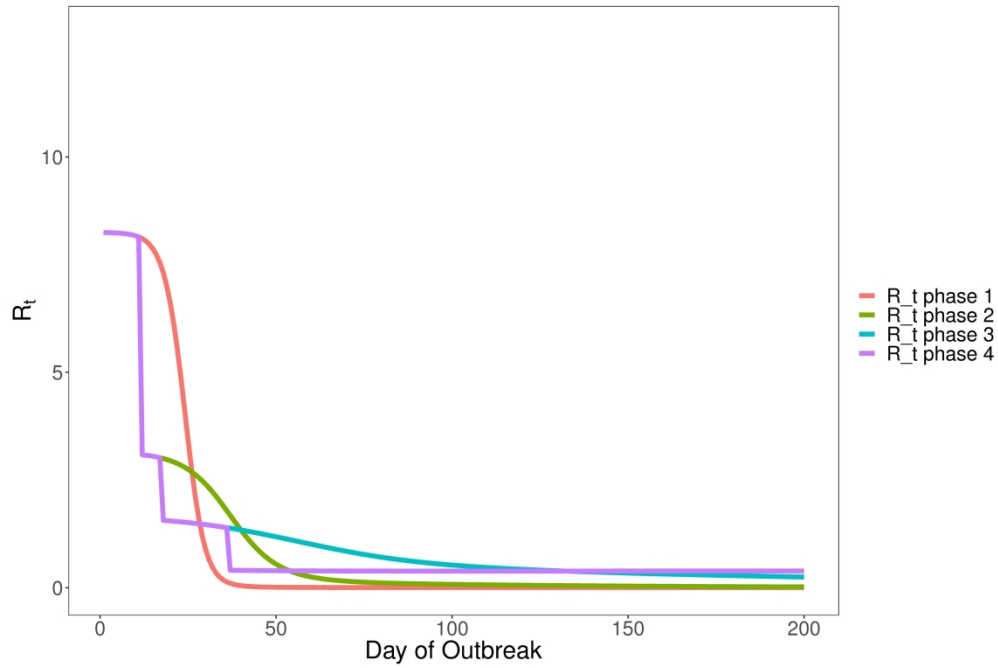

Figure 5. Calculated values of the effective reproduction ratio  $R_t$  for all intervention phases (Phase 1: initial outbreak, Phase 2: depopulation began, Phase 3: increased single celling, Phase 4: widespread testing of asymptomatic incarcerated individuals).

317x211mm (300 x 300 DPI)

1  
2  
3  
4  
5  
6  
7  
8  
9  
10  
11  
12  
13  
14  
15  
16  
17  
18  
19  
20  
21  
22  
23  
24  
25  
26  
27  
28  
29  
30  
31  
32  
33  
34  
35  
36  
37  
38  
39  
40  
41  
42  
43  
44  
45  
46  
47  
48  
49  
50  
51  
52  
53  
54  
55  
56  
57  
58  
59  
60

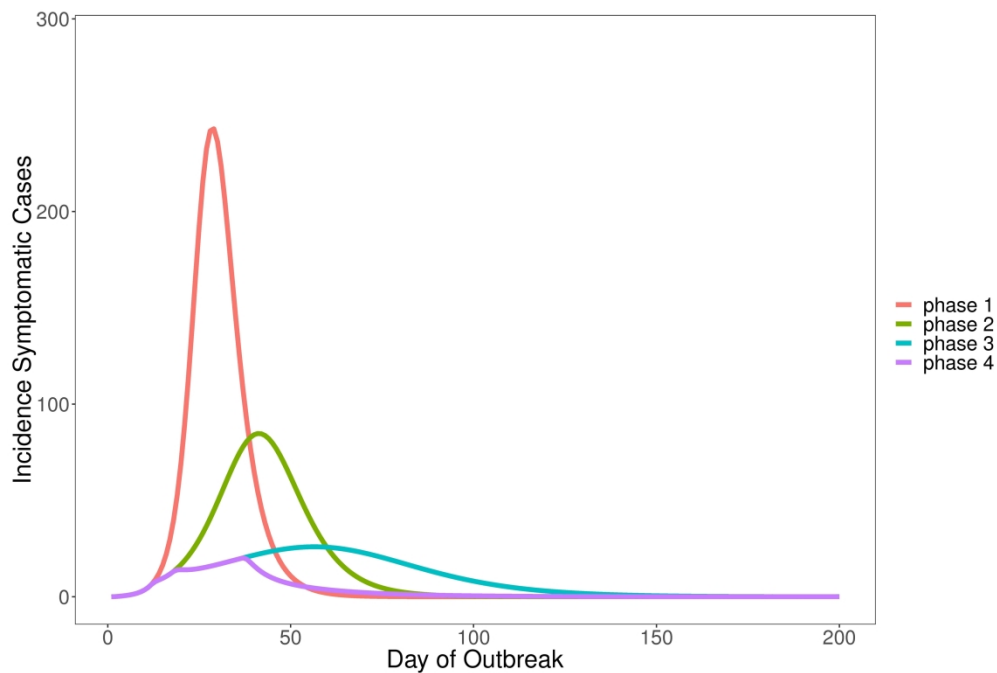

Figure 6. Projected incidence of symptomatic cases for all intervention phases (Phase 1: initial outbreak, Phase 2: depopulation began, Phase 3: increased single celling, Phase 4: widespread testing of asymptomatic incarcerated individuals).

317x211mm (300 x 300 DPI)

# BMJ Open

## The effectiveness of interventions to reduce COVID-19 transmission in a large urban jail: A model-based analysis

|                                 |                                                                                                                                                                                                                                                                                                                                                                                                                                                                                                                                               |
|---------------------------------|-----------------------------------------------------------------------------------------------------------------------------------------------------------------------------------------------------------------------------------------------------------------------------------------------------------------------------------------------------------------------------------------------------------------------------------------------------------------------------------------------------------------------------------------------|
| Journal:                        | <i>BMJ Open</i>                                                                                                                                                                                                                                                                                                                                                                                                                                                                                                                               |
| Manuscript ID                   | bmjopen-2020-042898.R1                                                                                                                                                                                                                                                                                                                                                                                                                                                                                                                        |
| Article Type:                   | Original research                                                                                                                                                                                                                                                                                                                                                                                                                                                                                                                             |
| Date Submitted by the Author:   | 21-Nov-2020                                                                                                                                                                                                                                                                                                                                                                                                                                                                                                                                   |
| Complete List of Authors:       | MALLOY, GIOVANNI; Stanford University, Management Science and Engineering<br>Puglisi, Lisa; Yale University, Internal Medicine; VA Connecticut Healthcare System, Pain Research, Informatics, Multimorbidities and Education Center<br>Brandeau, Margaret ; Stanford University, Management Science and Engineering<br>Harvey, Tyler; Yale University, SEICHE Center for Health and Justice, School of Medicine<br>Wang, Emily; Yale University, Internal Medicine; Yale University, SEICHE Center for Health and Justice, School of Medicine |
| <b>Primary Subject Heading</b>: | Health policy                                                                                                                                                                                                                                                                                                                                                                                                                                                                                                                                 |
| Secondary Subject Heading:      | Infectious diseases, Public health, Epidemiology, Health informatics                                                                                                                                                                                                                                                                                                                                                                                                                                                                          |
| Keywords:                       | COVID-19, EPIDEMIOLOGY, Health policy < HEALTH SERVICES ADMINISTRATION & MANAGEMENT, Public health < INFECTIOUS DISEASES, Infection control < INFECTIOUS DISEASES                                                                                                                                                                                                                                                                                                                                                                             |
|                                 |                                                                                                                                                                                                                                                                                                                                                                                                                                                                                                                                               |

SCHOLARONE™  
Manuscripts

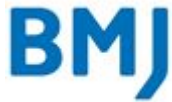

I, the Submitting Author has the right to grant and does grant on behalf of all authors of the Work (as defined in the below author licence), an exclusive licence and/or a non-exclusive licence for contributions from authors who are: i) UK Crown employees; ii) where BMJ has agreed a CC-BY licence shall apply, and/or iii) in accordance with the terms applicable for US Federal Government officers or employees acting as part of their official duties; on a worldwide, perpetual, irrevocable, royalty-free basis to BMJ Publishing Group Ltd ("BMJ") its licensees and where the relevant Journal is co-owned by BMJ to the co-owners of the Journal, to publish the Work in this journal and any other BMJ products and to exploit all rights, as set out in our [licence](#).

The Submitting Author accepts and understands that any supply made under these terms is made by BMJ to the Submitting Author unless you are acting as an employee on behalf of your employer or a postgraduate student of an affiliated institution which is paying any applicable article publishing charge ("APC") for Open Access articles. Where the Submitting Author wishes to make the Work available on an Open Access basis (and intends to pay the relevant APC), the terms of reuse of such Open Access shall be governed by a Creative Commons licence – details of these licences and which [Creative Commons](#) licence will apply to this Work are set out in our licence referred to above.

Other than as permitted in any relevant BMJ Author's Self Archiving Policies, I confirm this Work has not been accepted for publication elsewhere, is not being considered for publication elsewhere and does not duplicate material already published. I confirm all authors consent to publication of this Work and authorise the granting of this licence.



1  
2  
3 1 **The effectiveness of interventions to reduce COVID-19 transmission in a large urban jail:**

4  
5 2 **A model-based analysis**

6  
7 3  
8  
9  
10 4 Giovanni S. P. Malloy<sup>1</sup>, Lisa B. Puglisi, MD<sup>2,3,4</sup>, Margaret L. Brandeau, PhD<sup>1</sup>, Tyler D. Harvey,  
11  
12 5 MPH<sup>4</sup>, Emily A. Wang, MD<sup>2,4</sup>

13  
14  
15 6  
16 7  
17 8  
18 9  
19 10 <sup>1</sup>Department of Management Science and Engineering, School of Engineering, Stanford  
20 11 University, Stanford, CA, USA

21  
22 12 <sup>2</sup>Department of Internal Medicine, School of Medicine, Yale University, New Haven, CT, USA

23  
24 13 <sup>3</sup>Pain Research, Informatics, Multimorbidities and Education Center, VA Connecticut Healthcare  
25 14 System, West Haven, CT, USA

26 15  
27 16 <sup>4</sup> SEICHE Center for Health and Justice, School of Medicine, Yale University, New Haven, CT,  
28 17 USA

29 18  
30  
31  
32 19 **Corresponding Author:**

33 20 Giovanni S. P. Malloy  
34 21 475 Via Ortega, Stanford, CA 94305  
35 22 315-569-2075  
36 23 [malloyg@stanford.edu](mailto:malloyg@stanford.edu)

37 24  
38 25 Abstract word count: 245

39 26 Text word count: 4161

40  
41  
42  
43  
44 27  
45  
46  
47  
48  
49  
50  
51  
52  
53  
54  
55  
56  
57  
58  
59  
60

1  
2  
3 28 **ABSTRACT**  
4

5 29 **Objectives:** We aim to estimate the impact of various mitigation strategies on COVID-19  
6  
7  
8 30 transmission in a U.S. jail beyond those offered in national guidelines.  
9

10 31 **Design:** We developed a stochastic dynamic transmission model of COVID-19.  
11

12 32 **Setting:** One anonymous large urban U.S. jail.  
13

14 33 **Participants:** Several thousand staff and incarcerated individuals.  
15

16  
17 34 **Interventions:** There were four intervention phases during the outbreak: the start of the  
18  
19 35 outbreak, depopulation of the jail, increased proportion of people in single cells, and  
20  
21 36 asymptomatic testing. These interventions were implemented incrementally and in concert with  
22  
23 37 one another.  
24  
25

26 38 **Primary and Secondary Outcome Measures:** The basic reproduction ratio,  $R_0$ , in each phase,  
27  
28 39 as estimated using the next generation method. The fraction of new cases, hospitalizations, and  
29  
30 40 deaths averted by these interventions (along with the standard measures of sanitization, masking,  
31  
32 41 and social distancing interventions).  
33  
34

35 42 **Results:** For the first outbreak phase, the estimated  $R_0$  was 8.44 (95% CrI: 5.00 to 13.10), and  
36  
37 43 for the subsequent phases,  $R_{0,phase\ 2} = 3.64$  (95% CrI: 2.43 to 5.11),  $R_{0,phase\ 3} = 1.72$  (95% CrI:  
38  
39 44 1.40 to 2.12), and  $R_{0,phase\ 4} = 0.58$  (95% CrI: 0.43 to 0.75). In total, the jail's interventions  
40  
41 45 prevented approximately 83% of projected cases, hospitalizations, and deaths over 83 days.  
42  
43  
44

45 46 **Conclusions:** Depopulation, single celling, and asymptomatic testing within jails can be  
46  
47 47 effective strategies to mitigate COVID-19 transmission in addition to standard public health  
48  
49 48 measures. Decision makers should prioritize reductions in the jail population, single celling, and  
50  
51 49 testing asymptomatic populations as additional measures to manage COVID-19 within  
52  
53 50 correctional settings.  
54  
55  
56  
57

1  
2  
3 51 **Strengths and limitations of this study**

- 4 52
- 5 53 • COVID-19 has entered hundreds of correctional facilities in the United States, yet few empirical studies have focused on COVID-19 transmission in correctional facilities.
  - 6 54 • We developed a stochastic dynamic transmission model describing the spread of COVID-19 in a large urban jail in the United States and calibrated the model to a moving average of the daily incident cases of COVID-19 reported by the jail.
  - 7 55 • We identified three major interventions – depopulation, single celling, and asymptomatic testing – undertaken by the jail and quantified the reduction in transmission rate as a result of these interventions.
  - 8 56 • We report the estimated reduction in predicted cases, hospitalizations, and deaths as a result of the jail interventions among both incarcerated people and correctional staff.
  - 9 57 • The model assumes homogeneous mixing and does not capture transmission to and from the surrounding community.
  - 10 58
  - 11 59
  - 12 60
  - 13 61
  - 14 62
  - 15 63
  - 16 64
  - 17
  - 18
  - 19
  - 20
  - 21
  - 22
  - 23
  - 24
  - 25
  - 26
  - 27
  - 28
  - 29
  - 30
  - 31
  - 32
  - 33
  - 34
  - 35
  - 36
  - 37
  - 38
  - 39
  - 40
  - 41
  - 42
  - 43
  - 44
  - 45
  - 46
  - 47
  - 48
  - 49
  - 50
  - 51
  - 52
  - 53
  - 54
  - 55
  - 56
  - 57
  - 58
  - 59
  - 60

## 65 INTRODUCTION

66 COVID-19, the disease caused by the SARS-CoV-2 virus, has affected millions of people  
67 worldwide, with disproportionate impact on some communities including those inside  
68 correctional facilities. In the United States (U.S.), approximately 2.2 million people are  
69 incarcerated in any given day in over 5,000 facilities,<sup>1</sup> where the built environment and activities  
70 of daily living make physical distancing exceedingly difficult to implement.<sup>2-4</sup> As of the third  
71 week of April 2020, 420 U.S. correctional facilities had at least one diagnosed case of COVID-  
72 19, accounting for a total of 4,893 cases among incarcerated individuals and 2,778 cases among  
73 staff members.<sup>3</sup> As of June, correctional facilities accounted for eight out of ten of the largest  
74 COVID-19 outbreaks nationally, surpassing nursing homes and food processing plants, and 26  
75 states had a higher rate of COVID-19 infection in their correctional population than in their  
76 general population.<sup>5, 6</sup> In spring 2020, Cook County Jail had one of the largest outbreaks in the  
77 country, and the infection rate at Rikers Island was nearly five times that of New York City.<sup>7, 8</sup>  
78  
79 Despite the severity of outbreaks in correctional facilities, national guidance surrounding the  
80 prevention and management of COVID-19 within such settings has been limited. In the weeks  
81 after the first major outbreak in a U.S. jail, the U.S. Centers for Disease Control and Prevention  
82 (CDC) published policy guidelines for correctional facilities to help mitigate COVID-19  
83 transmission; these included limiting transfer of incarcerated people between facilities,  
84 restricting the number of visitors entering facilities, promoting personal hygiene and  
85 environmental sanitization, maximizing the space between those incarcerated (i.e., arranging  
86 bunks so individuals sleep head to toe), and screening staff for symptoms.<sup>9</sup>

87

1  
2  
3 88 However, CDC guidelines then and still now do not account for the difficulty that many facilities  
4  
5 89 face in managing COVID-19. Even among those facilities which are not crowded, physical  
6  
7 90 distancing is challenging given use of congregate living arrangements, shared meals, and  
8  
9 91 exercise and recreation programming. In the absence of more targeted guidelines, there is wide  
10  
11 92 variance in how correctional facilities are managing COVID-19, especially regarding  
12  
13 93 depopulation efforts that may mitigate COVID-19 and approaches to testing (symptomatic only  
14  
15 94 vs. asymptomatic, viral testing vs. antibody testing). As an example, Attorney General Barr has  
16  
17 95 ordered that medically frail individuals in federal prisons be released to home quarantine,  
18  
19 96 whereas many U.S. state prison systems have no stated policies for larger scale release. Some  
20  
21 97 correctional systems have implemented a one-time systemwide testing of all incarcerated  
22  
23 98 individuals, including those who are asymptomatic, while others are only testing those who are  
24  
25 99 symptomatic.  
26  
27  
28  
29  
30

31 100  
32  
33 101 The effectiveness of various mitigation measures, many of which fall outside of CDC guidance,  
34  
35 102 in reducing the transmission of COVID-19 within correctional facilities has yet to be established.  
36  
37 103 In this study, we estimate the effectiveness of measures beyond standard CDC recommendations  
38  
39 104 to mitigate the spread of COVID-19 in a large urban jail. With the aim of providing guidance to  
40  
41 105 correctional policymakers and public health agencies, we focus on policies that could have large  
42  
43 106 impact and are highly variable in implementation, namely depopulation (cessation of new  
44  
45 107 detentions and release of incarcerated individuals), single celling (percentage of the total  
46  
47 108 incarcerated population in a single cell), and testing asymptomatic individuals.  
48  
49  
50  
51  
52  
53  
54  
55  
56  
57  
58  
59  
60

## 109 METHODS

110 We developed a stochastic dynamic transmission model of COVID-19 which we calibrated to  
111 the outbreak in the jail. We combined data on cases among incarcerated people and correctional  
112 staff because they interact very closely and regularly as an ecosystem behind the walls of the jail.  
113 Cases were confirmed using SARS-CoV-2 nasal swab PCR tests. We divided the outbreak  
114 timeline into four intervention phases marked by the start of the outbreak, start of depopulation  
115 efforts, increased single celling, and large-scale asymptomatic testing of incarcerated individuals.  
116 We estimated the initial basic reproduction ratio,  $R_0$ , and the effective reproduction ratio,  $R_t$ , in  
117 each phase, for the entire jail. We also estimated the fraction of new cases, hospitalizations, and  
118 deaths averted by the combined interventions in addition to the standard CDC recommended  
119 guidance.

120

### 121 *Model description*

122 We modified a traditional SEIR model to represent the disease states of COVID-19. These  
123 disease states included susceptible ( $S$ ), exposed ( $E$ ), infected symptomatic ( $I_{sym}$ ), infected  
124 asymptomatic ( $I_{asym}$ ), infected asymptomatic undetected ( $I_{asym,undetected}$ ), quarantined  
125 symptomatic ( $Q$ ), quarantined asymptomatic ( $Q_{asym}$ ), hospitalized ( $H$ ), and recovered ( $Rec$ )  
126 individuals (Figure 1). Individuals in the infected states ( $I_{sym}$ ,  $I_{asym}$ ,  $I_{asym,undetected}$ ) are assumed  
127 to be infectious, whereas individuals in the exposed state ( $E$ ) are not yet infectious. Some  
128 correctional systems distinguish between quarantining exposed groups together and isolating  
129 confirmed cases. In this model, the quarantined state includes both.

130

1  
2  
3 131 To model these interacting populations, we developed a mass-action mixing model described by  
4  
5 132 the following equations:

$$6 \quad 133 \quad \frac{dS}{dt} = bS - \frac{\beta S}{N}(I_{sym} + I_{asym} + I_{asym,undetected}) \quad (1)$$

$$7 \quad 134 \quad \frac{dE}{dt} = bE + \frac{\beta S}{N}(I_{sym} + I_{asym} + I_{asym,undetected}) - \varepsilon E \quad (2)$$

$$8 \quad 135 \quad \frac{dI_{sym}}{dt} = (1 - \alpha)\varepsilon E - I_{sym} \quad (3)$$

$$9 \quad 136 \quad \frac{dI_{asym}}{dt} = bI_{asym} + \alpha\varepsilon E - I_{asym} \quad (4)$$

$$10 \quad 137 \quad \frac{dI_{asym,undetected}}{dt} = bI_{asym,undetected} + (1 - p_{detected})I_{asym} - \gamma I_{asym,undetected} \quad (5)$$

$$11 \quad 138 \quad \frac{dQ}{dt} = I_{sym} - (1 - \eta)\gamma Q - \eta\left(\frac{1}{\gamma} - \frac{1}{\mu}\right)^{-1} Q \quad (6)$$

$$12 \quad 139 \quad \frac{dQ_{asym}}{dt} = p_{detected}I_{asym} - \gamma Q_{asym} \quad (7)$$

$$13 \quad 140 \quad \frac{dH}{dt} = \eta\left(\frac{1}{\gamma} - \frac{1}{\mu}\right)^{-1} Q - \mu H \quad (8)$$

$$14 \quad 141 \quad \frac{dRec}{dt} = (1 - d_I)(1 - \eta)\gamma Q + (1 - d_I)\mu H + \gamma I_{asym,undetected} + \gamma Q_{asym} \quad (9)$$

$$15 \quad 142 \quad \frac{dDead}{dt} = d_I(1 - \eta)\gamma Q + d_I\mu H \quad (10)$$

$$16 \quad 143 \quad N = S + E + I_{sym} + I_{asym} + I_{asym,undetected} + Q + Q_{asym} + H + Rec \quad (11)$$

17 144 The susceptible, exposed, and asymptomatic infected populations grew at rate  $b$  which  
18 145 represented the overall growth or reduction in jail population. We assume that symptomatic  
19 146 infected individuals are not removed from the jail during general depopulation and would be  
20 147 admitted directly to quarantine. For the time horizon of the model, the population was generally  
21 148 shrinking. Susceptible individuals were exposed to COVID-19 at transmission rate  $\beta$ . We re-  
22 149 calibrated this transmission rate for each of the four outbreak phases. We assumed that  
23 150 asymptomatic and symptomatic infected individuals could transmit the disease.<sup>10, 11</sup> Exposed

1  
2  
3 151 individuals were not yet infectious and become asymptomatic or symptomatic infected at rate  $\varepsilon$ ,  
4  
5 152 which corresponded to the incubation period of COVID-19. A certain proportion,  $\alpha$ , of these  
6  
7 153 individuals stayed asymptomatic, while remaining individuals became symptomatic. Based on  
8  
9 154 the jail's report, we assumed that symptomatic infected individuals and a fraction,  $p_{detected}$ , of  
10  
11 155 asymptomatic infected individuals were identified one day after symptoms presented and placed  
12  
13 156 in quarantine after identification. We assumed that individuals once quarantined did not transmit  
14  
15 157 COVID-19, as they were isolated from the susceptible population. A fraction,  $\eta$ , of quarantined  
16  
17 158 individuals were hospitalized and recovered from hospitalization at rate  $\mu$ . All infected  
18  
19 159 individuals recovered or died at rate  $\gamma$  regardless of symptomatic or asymptomatic status.  
20  
21  
22 160 Symptomatic infected individuals died with probability  $d_I$ .  
23  
24  
25  
26  
27  
28

### 29 162 *Interventions*

30  
31 163 The jail implemented various measures over time to mitigate the spread of COVID-19. We  
32  
33 164 divide the outbreak into four intervention phases, corresponding to the initiation of key measures  
34  
35 165 of interest which fell outside the guidance of the CDC. The interventions were implemented  
36  
37 166 incrementally and in an additive manner, with depopulation first added, then single-celling  
38  
39 167 added, then asymptomatic testing added. The days when these interventions were added are  
40  
41  
42 168 shown in Figure 2.  
43  
44

45 169  
46  
47 170 During Phase 1 (days 1-11), the jail implemented a broad array of strategies that were consistent  
48  
49 171 with CDC guidance including: basic screening for flu-like symptoms in incarcerated people; new  
50  
51 172 detainees quarantined for at least 7 days; basic screening for flu-like symptoms for visitors,  
52  
53  
54 173 vendors, attorneys, and community members entering the facility; staff required to report  
55  
56  
57



1  
2  
3 174 symptoms, as well as contact with known COVID-19 positive cases and any travel outside of the  
4  
5 175 U.S.; suspension of all tours, large gatherings, and in-person visitation. Sanitation techniques  
6  
7 176 continued to follow CDC guidance for the duration of the outbreak and no significant new  
8  
9  
10 177 techniques were introduced during any other phases. A total of 23 SARS-Co-V-2 tests were  
11  
12 178 performed in this phase; 19 were positive (positivity rate 82.6%).  
13

14  
15 179  
16  
17 180 During phase 2 (days 12-17), the jail population started to decrease by 1.41% each day through a  
18  
19 181 combination of measures which included a marked decrease in new detentions given changes in  
20  
21 182 court and judicial system procedures and large community organized bail outs (Figure 2). The  
22  
23 183 jail also began taking the temperature of all employees each day. Lastly, they started on-site  
24  
25 184 voluntary testing for employees and a two-week COVID-19 paid leave policy for all employees.  
26  
27 185 A total of 149 SARS-Co-V-2 tests were performed in this phase; 139 were positive (positivity  
28  
29 186 rate 93.2%).  
30  
31

32  
33 187  
34  
35 188 During phase 3 (days 18-36), the jail began increasing the proportion of the population in single-  
36  
37 189 occupancy cells from 26% on day 18 to 54% on day 36. During this period, they began requiring  
38  
39 190 all staff to wear surgical masks and allotted new masks to those incarcerated each day. They also  
40  
41 191 continued to isolate confirmed and suspected COVID-19 cases among incarcerated individuals.  
42  
43 192 At this time, given the growing number of individuals, they identified a different building for  
44  
45 193 segregating patients which provided a larger space for confirmed cases. A total of 455 SARS-  
46  
47 194 Co-V-2 tests were performed in this phase; 253 were positive (positivity rate 55.6%).  
48  
49

50  
51 195  
52  
53  
54  
55  
56  
57  
58  
59  
60

1  
2  
3 196 During phase 4 (days 37-83), the jail began testing for asymptomatic cases at a rate of  
4  
5 197 approximately 50-75 people per day in divisions with high numbers of cases identified during  
6  
7 198 contact tracing. A total of 2741 SARS-Co-V-2 tests were performed in this phase; 523 were  
8  
9 199 positive (positivity rate 19.5%).  
10  
11

12 200

### 14 201 *Model Instantiation and Calibration*

16 202 We estimated some model parameter values from previous literature (Table 1). The rate at which  
17  
18 203 exposed individuals became asymptotically or symptomatically infected,  $\epsilon$ , was the inverse of  
19  
20 204 the incubation period. The incubation period of COVID-19 was previously described with a  
21  
22 205 lognormal distribution with mean 5.1 days and standard deviation 0.89 days.<sup>12</sup> We assumed that  
23  
24 206 the proportion of infections that are asymptomatic,  $\alpha$ , was uniformly distributed over the range  
25  
26 207 0.25 to 0.56.<sup>13, 14</sup> The average recovery rate was previously estimated to be 0.1, the inverse of the  
27  
28 208 10-day mean infection period.<sup>15</sup> We assumed that the infection period followed a truncated  
29  
30 209 normal distribution with mean 10 days, standard deviation 6.25 days, minimum 5 days, and  
31  
32 210 maximum 20 days. Additionally, the average length of hospitalization from COVID-19 has been  
33  
34 211 estimated to be 5 days, making the daily recovery probability from the hospital 0.2.<sup>16</sup> We  
35  
36 212 assumed that the length of hospitalization followed a lognormal distribution with a mean of 5  
37  
38 213 days and standard deviation of 1 day.  
39  
40  
41  
42  
43  
44

45 214

46 215 The jail provided demographic data about the size of the incarcerated population per day, as well  
47  
48 216 as epidemiological data about confirmed COVID-19 cases over the course of 83 days. We  
49  
50 217 assumed an average reporting delay of six days from first exposure to reported incident cases.  
51  
52 218 This accounts for the mean incubation period and a minor delay between symptom onset and  
53  
54  
55  
56  
57

1  
2  
3 219 COVID-19 test result and isolation. The jail provided data on the age of the infected person, date  
4  
5 220 of positive COVID-19 test, the work or incarceration location of the infected individual, and  
6  
7 221 whether the individual was hospitalized or died as a result of the COVID-19 infection. Testing  
8  
9 222 was performed upon admission to the jail and through symptom onset or contact tracing. We  
10  
11 223 used these data to calculate the proportion of symptomatic infections that were hospitalized or  
12  
13 224 died. For each intervention phase, we used the epidemiological data to determine the growth rate,  
14  
15 225  $b$ , as the average rate of growth for the entire facility.  
16  
17  
18  
19 226

20  
21 227 We calibrated the transmission rate,  $\beta$ , for each intervention phase. We first pseudo-randomly  
22  
23 228 selected values for parameters  $\varepsilon$ ,  $\alpha$ ,  $\gamma$ , and  $\mu$  based on our assumed distributions (Table 1). Then,  
24  
25 229 we calculated  $b$  for the intervention phase. To find the best-fitting value of  $\beta$  for the given  
26  
27 230 parameter set, we implemented an exhaustive search over the range  $[0,4]$  in increments of 0.01.  
28  
29 231 We chose the value of  $\beta$  which minimized the sum of mean squared error between the reported  
30  
31 232 daily incident cases of confirmed COVID-19 cases among incarcerated people and staff in the  
32  
33 233 jail to the daily incident cases of symptomatic infected cases in the model for that phase. We  
34  
35 234 calculated incident symptomatic cases using the raw reported incident cases before  
36  
37 235 asymptomatic testing. Select asymptomatic testing for incarcerated people began on day 31 and  
38  
39 236 for staff began on site on day 21. After asymptomatic testing began, we took the minimum of the  
40  
41 237 jail-provided data on the number of symptomatic tests multiplied by the average percentage of  
42  
43 238 positive results of symptomatic tests between days 16-30 (89%) and the raw reported incident  
44  
45 239 cases. Based on this estimate, on average, 82% of the reported daily incident cases among the  
46  
47 240 incarcerated population was symptomatic after asymptomatic testing began. Because we did not  
48  
49  
50  
51  
52  
53  
54  
55  
56  
57  
58  
59  
60

241 have testing data for staff, we assumed that 82% of reported new staff cases were symptomatic  
 242 after on-site testing became available for staff.

243  
 244 We used a simple moving average of the previous five days of symptomatic incident cases to  
 245 smooth the calibration targets. We assumed that the reported incident cases corresponded to the  
 246 number of incarcerated individuals and staff members who showed symptoms of COVID-19. For  
 247 each intervention phase, we ran 1,000 Monte Carlo simulations and defined the 95% credible  
 248 interval of  $\beta$  as the range in which 95% of calibrated values of  $\beta$  fell.

249

#### 250 *Calculation of $R_0$ and $R_t$*

251 To calculate  $R_0$  and  $R_t$ , we used the next generation method.<sup>17</sup> This method utilizes two matrices  
 252 of partial derivatives of compartments with infected individuals.<sup>18</sup> In our model, this included  
 253 exposed, asymptomatic infected, symptomatic infected, quarantined, and hospitalized  
 254 individuals. The first matrix,  $F$ , is the rate of appearance of new infections for each  
 255 compartment. Each element,  $f_{ij}$ , of  $F$  is the partial derivative of any term in which new  
 256 infections appear in compartment  $i$  with respect to compartment  $j$  where  $i, j \in$   
 257  $[E, I_{sym}, I_{asym}, I_{asym,undetected}, Q, Q_{asym}, H]$ .

$$258 \quad F = \begin{matrix} E \\ I_{sym} \\ I_{asym} \\ I_{asym,undetected} \\ Q \\ Q_{asym} \\ H \end{matrix} \begin{bmatrix} 0 & \frac{\beta S}{N} & \frac{\beta S}{N} & \frac{\beta S}{N} & 0 & 0 & 0 \\ 0 & 0 & 0 & 0 & 0 & 0 & 0 \\ 0 & 0 & 0 & 0 & 0 & 0 & 0 \\ 0 & 0 & 0 & 0 & 0 & 0 & 0 \\ 0 & 0 & 0 & 0 & 0 & 0 & 0 \\ 0 & 0 & 0 & 0 & 0 & 0 & 0 \\ 0 & 0 & 0 & 0 & 0 & 0 & 0 \end{bmatrix} \quad (10)$$

259 The second matrix,  $V$ , is the rate of transfer of individuals out of a compartment minus the rate of  
 260 transfer of individuals into a compartment. Therefore, each element,  $v_{ij}$ , of  $V$  is the partial

261 derivative of the additive inverse of any term other than the appearance of new infections in  
 262 compartment  $i$  with respect to compartment  $j$ . The matrix  $V$  and its inverse are as follows:

$$263 \quad V = \begin{matrix} E \\ I_{sym} \\ I_{asym} \\ I_{asym,undetected} \\ Q \\ Q_{asym} \\ H \end{matrix} \begin{bmatrix} \varepsilon - b & 0 & 0 & 0 & 0 & 0 & 0 \\ -(1 - \alpha)\varepsilon & 1 & 0 & 0 & 0 & 0 & 0 \\ -\alpha\varepsilon & 0 & 1 - b & 0 & 0 & 0 & 0 \\ 0 & 0 & -(1 - p_{detected}) & \gamma - b & 0 & 0 & 0 \\ 0 & -1 & 0 & 0 & (1 - \eta)\gamma + \eta\left(\frac{1}{\gamma} - \frac{1}{\mu}\right)^{-1} & 0 & 0 \\ 0 & 0 & -p_{detected} & 0 & 0 & \gamma & 0 \\ 0 & 0 & 0 & 0 & -\eta\left(\frac{1}{\gamma} - \frac{1}{\mu}\right)^{-1} & 0 & \mu \end{bmatrix} \quad (11)$$

$$264 \quad V^{-1} = \begin{matrix} E \\ I_{sym} \\ I_{asym} \\ I_{asym,undetected} \\ Q \\ Q_{asym} \\ H \end{matrix} \begin{bmatrix} (\varepsilon - b)^{-1} & 0 & 0 & 0 & 0 & 0 & 0 \\ \frac{(\alpha - 1)\varepsilon}{b - \varepsilon} & 1 & 0 & 0 & 0 & 0 & 0 \\ \frac{\alpha\varepsilon}{(b - \varepsilon)(b - 1)} & 0 & (1 - b)^{-1} & 0 & 0 & 0 & 0 \\ \frac{\alpha(p_{detected} - 1)\varepsilon}{(b - \varepsilon)(b - 1)(b - \gamma)} & 0 & \frac{1 - p_{detected}}{(b - 1)(b - \gamma)} & (\gamma - b)^{-1} & 0 & 0 & 0 \\ \frac{-(\alpha - 1)\varepsilon(\gamma - \mu)}{\gamma(b - \varepsilon)(\gamma(\eta - 1) + \mu)} & \frac{\mu - \gamma}{\gamma(\gamma(\eta - 1) + \mu)} & 0 & 0 & \frac{\mu - \gamma}{\gamma(\gamma(\eta - 1) + \mu)} & 0 & 0 \\ \frac{\alpha p_{detected}\varepsilon}{(b - \varepsilon)(b - 1)\gamma} & 0 & \frac{p_{detected}}{\gamma - \gamma b} & 0 & 0 & \gamma^{-1} & 0 \\ \frac{(\alpha - 1)\eta\varepsilon}{(b - \varepsilon)(\gamma(\eta - 1) + \mu)} & \frac{\eta}{\gamma(\eta - 1) + \mu} & 0 & 0 & \frac{\eta}{\gamma(\eta - 1) + \mu} & 0 & \mu^{-1} \end{bmatrix} \quad (12)$$

265 The next generation method calculates  $R_0$  as the dominant eigenvalue of the next generation  
 266 matrix. The next generation matrix is defined as  $FV^{-1}$ :

$$267 \quad FV^{-1} = \begin{bmatrix} \frac{\beta S\varepsilon(ab^2 - aby + \alpha p_{detected} - \alpha - b^2 + b\gamma + b - \gamma)}{N(b - \varepsilon)(b - 1)(b - \gamma)} & \frac{\beta S}{N} & \frac{\beta S(\gamma - b - p_{detected} + 1)}{N(b - 1)(b - \gamma)} & \frac{\beta S}{N(\gamma - b)} & 0 & 0 & 0 \\ 0 & 0 & 0 & 0 & 0 & 0 & 0 \\ 0 & 0 & 0 & 0 & 0 & 0 & 0 \\ 0 & 0 & 0 & 0 & 0 & 0 & 0 \\ 0 & 0 & 0 & 0 & 0 & 0 & 0 \\ 0 & 0 & 0 & 0 & 0 & 0 & 0 \end{bmatrix} \quad (13)$$

268 In our model,  $FV^{-1}$  has only one nonzero eigenvalue,  $\lambda =$

$$269 \quad \frac{\beta S\varepsilon(ab^2 - aby + \alpha p_{detected} - \alpha - b^2 + b\gamma + b - \gamma)}{N(b - \varepsilon)(b - 1)(b - \gamma)}. \text{ Therefore, } R_0 = \max(0, \lambda), \text{ and since } \lambda \geq 0, R_0 = \lambda.$$

270 Since  $R_0$  is directly proportional to  $\beta$ , we can calculate the values of  $R_0$  of other phases simply  
 271 by using phase 1 starting conditions combined with the reduced transmission rate.

272

273 To find the effective reproduction ratio,  $R_t$ , at time  $t$ , we used the next generation method with  
 274 the same matrices but updated the values of  $S$  and  $\beta$  as appropriate. Because the number of  
 275 susceptible individuals,  $S$ , is a function of time, we recalculate  $R_t$  each day. The functional form  
 276 of  $R_t$  for our model is as follows:

$$277 \quad R_t = \frac{\beta S_t \varepsilon (\alpha b^2 - \alpha b \gamma + \alpha p_{\text{detected}} - \alpha - b^2 + b \gamma + b - \gamma)}{N(b - \varepsilon)(b - 1)(b - \gamma)} \quad (14)$$

278 We computed the 95% credible interval of  $R_t$  as the range in which 95% of calibrated values of  
 279  $R_t$  fell.

### 281 *Sensitivity Analysis*

282 We assumed that the average length of time in the exposed state (i.e., the incubation period) was  
 283 5.1 days based on a study of 181 cases in Wuhan, China.<sup>12</sup> Two recent studies estimated that 44-  
 284 48% of transmission can come from presymptomatic individuals, suggesting that the mean  
 285 length of time in the exposed state could be shorter than we assumed.<sup>19, 20</sup> Given this recent  
 286 evidence, we performed sensitivity analysis where we reduced the mean length of time in the  
 287 exposed state by 2.1 days, and correspondingly increased the mean length of time in the  
 288 infectious state by 2.1 days. The mean value of  $\varepsilon$  was updated accordingly to  $\frac{1}{3}$ . The model  
 289 otherwise remained unchanged.

### 291 *Human subjects*

292 This study was deemed exempt from IRB review by the Yale Human Investigation Committee as  
 293 we received completely anonymized data from the jail.

294

1  
2  
3 295 *Role of the funding source*  
4

5 296 The funding sources had no role in the study design, collection, analysis, and interpretation of  
6  
7 297 data, writing the report, nor the decision to submit the paper for publication.  
8  
9

10 298

11  
12 299 *Patient and public involvement*  
13

14 300 No patients were involved.  
15  
16

17 301

18  
19 302 **RESULTS**  
20

21 303 The number of daily reported incident cases of COVID-19 in the jail was highly variable,  
22  
23 304 ranging from 0 to 67. The mean absolute error of the model compared to the simple moving  
24  
25 305 average was 29% (Figure 3).  
26  
27

28 306

29  
30  
31 307 *Transmission Rates*  
32

33 308 When following the initial CDC recommendations for correctional facilities (phase 1), the  
34  
35 309 baseline transmission rate ( $\beta$ ) was 1.79 (95% Credible Interval (CrI): 1.35-2.22) (Figure 4).  
36

37 310 After depopulation began (phase 2), the transmission rate was  $\beta = 0.78$  (95% CrI: 0.61-0.97).  
38

39  
40 311 This represents a 56% decrease in the transmission rate from phase 1. After the increase in  
41  
42 312 single-occupancy cells (phase 3), the transmission rate was  $\beta = 0.38$  (95% CrI: 0.28-0.52), a 51%  
43  
44 313 decrease from phase 2. Finally, the transmission rate after testing of asymptomatic individuals  
45  
46 314 began (phase 4) was  $\beta = 0.13$  (95% CrI: 0.07-0.24), a 66% decrease from phase 3. All of these  
47  
48 315 reductions are statistically significant.  
49  
50

51  
52 316  
53  
54  
55  
56  
57  
58  
59  
60

### 317 *Reproduction Ratios*

318 The estimated value of  $R_0$  was highest in phase 1, during the first 11 days of the outbreak (Table  
319 2). For this phase, we estimate  $R_0 = 8.44$  (95% CrI: 5.00-13.10) (Table 2). We estimate  $R_0$  of  
320 each phase in a completely susceptible population as if the outbreak had begun with the values of  
321  $\beta$  which correspond to each phase:  $R_{0,phase\ 2} = 3.64$  (95% CrI: 2.43-5.11),  $R_{0,phase\ 3} = 1.72$  (95%  
322 CrI: 1.40-2.12), and  $R_{0,phase\ 4} = 0.58$  (95% CrI: 0.43-0.75). Figure 5 shows the effective  
323 reproduction ratio,  $R_t$ , over time for all intervention phases.  $R_t$  decreased as the susceptible  
324 population shrank, the transmission rate changed, and different interventions were implemented.  
325 For the entire jail, we estimate that the interventions may have reduced the effective reproduction  
326 ratio  $R_t$  below 1 about five weeks after the outbreak began (on day 37).

### 328 *Averted Infections, Hospitalizations, and Deaths*

329 Table 2 shows the expected total symptomatic cases on day 83 and expected total cases on day  
330 200, assuming that the estimated transmission rate for a particular outbreak phase holds over all  
331 subsequent days. Over the first 83 days of the outbreak, the jail reported 778 symptomatic cases,  
332 67 hospitalizations, and 10 deaths among incarcerated individuals and staff. Our model predicts  
333 635 symptomatic cases (95% CrI: 506-821), 89 hospitalizations (95% CrI: 71-115), and 6 deaths  
334 (95% CrI: 5.8-6.7) over this same time period (Figure 6). Our estimate is 18% less than the  
335 number of reported cases that were symptomatic. Compared to what could have happened with  
336 only the implemented CDC-recommended interventions of phase 1, the model predicts a  
337 reduction of approximately 3,100 symptomatic cases, 435 hospitalizations, and 30 deaths over 83  
338 days. This suggests that the combination of interventions (depopulation, increased single celling,  
339 and large-scale asymptomatic testing of incarcerated individuals) in addition to standard CDC



1  
2  
3 340 COVID-19 mitigation strategies led to an 83% reduction in predicted symptomatic cases,  
4  
5 341 hospitalizations, and predicted deaths.  
6  
7

8 342

9  
10 343 *Sensitivity Analysis*

11  
12 344 In sensitivity analysis, when we assumed an incubation period that was 2.1 days shorter, the  
13  
14 345 calibrated baseline transmission rate was  $\beta=1.31$  (95% CrI: 1.00-1.71). After depopulation began  
15  
16 346 (phase 2), the transmission rate was  $\beta=0.64$  (95% CrI: 0.41-0.83). This represents a 51%  
17  
18 347 decrease in the transmission rate from phase 1 (compared to a 56% decrease in the base case  
19  
20 348 results). After the increase in single-occupancy cells (phase 3), the transmission rate was  $\beta=$   
21  
22 349 0.36 (95% CrI: 0.25-0.49), a 44% decrease from phase 2 (compared to a 51% decrease in the  
23  
24 350 base case results). Finally, the transmission rate after testing of asymptomatic individuals began  
25  
26 351 (phase 4) was  $\beta=0.17$  (95% CrI: 0.09-0.30), a 53% decrease from phase 3 (compared to 66% in  
27  
28 352 the base case). We estimate the following basic reproduction ratios:  $R_0 = 6.22$  (95% CrI: 3.56-  
29  
30 353 9.98),  $R_{0,phase\ 2} = 3.02$  (95% CrI: 1.95-4.32),  $R_{0,phase\ 3} = 1.64$  (95% CrI: 1.33-2.02), and  
31  
32 354  $R_{0,phase\ 4} = 0.75$  (95% CrI: 0.59-0.92).  
33  
34  
35  
36  
37  
38  
39  
40

41 356 Over the first 83 days of the outbreak, the sensitivity analysis predicts 637 symptomatic cases  
42  
43 357 (95% CrI: 502-827), 89 hospitalizations (95% CrI: 70-116), and 6 deaths (95% CrI: 5.8-6.8),  
44  
45 358 values very close to those predicted in the base case analysis. Thus, even assuming a shorter  
46  
47 359 incubation period, we estimate that the mitigation strategies led to an 83% reduction in predicted  
48  
49 360 symptomatic cases, hospitalizations, and deaths.  
50  
51

52 361

53  
54 362 **DISCUSSION**

1  
2  
3 363 *Principal findings*  
4

5 364 Using a stochastic compartmental model, we estimate that depopulation efforts, single celling  
6  
7 365 and asymptomatic testing are important interventions to reduce COVID-19 transmission in jails.  
8  
9  
10 366 We estimate that these actions taken by the jail, in addition to those recommended by the CDC  
11  
12 367 including sanitation and masking, reduced potential new cases by approximately 83% over 83  
13  
14 368 days, and this may have averted more than 435 hospitalizations and 30 deaths among those who  
15  
16 369 live and work in the jail. Taken together, these measures not only have bearing for the  
17  
18 370 correctional facility, but also for the community health systems that surround the jail.  
19  
20

21 371

22  
23  
24 372 *Policy Implications*  
25

26 373 Our findings suggest that depopulation efforts should be a primary strategy for COVID-19  
27  
28 374 mitigation in jails. Reduction in detained populations to prevent disease transmission is best  
29  
30 375 achieved by both decreasing the number of new intakes and increasing the number of releases.  
31  
32 376 This requires that authorities controlling jail admissions (including police departments, judges,  
33  
34 377 and in some cases correctional departments) and jail releases (including judges, lawyers, and  
35  
36 378 community bail funds) focus on promoting depopulation efforts to mitigate COVID-19  
37  
38 379 transmission.  
39  
40  
41

42 380

43  
44 381 By creating smaller populations within correctional institutions, other mitigation strategies,  
45  
46 382 including physical distancing and the ability to quarantine and medically isolate the incarcerated  
47  
48 383 population that remains when necessary, are easier to implement. Our analysis suggests that  
49  
50 384 single celling, in concert with depopulation, was effective in mitigating COVID-19 transmission.  
51  
52  
53 385 To be clear, single celling does not imply solitary confinement but rather placing one person in a  
54  
55  
56  
57  
58  
59  
60

1  
2  
3 386 6×9-foot cell to increase physical distancing in correctional facilities.<sup>21</sup> Given physical crowding  
4  
5 387 in many facilities, even when overall incarcerated populations are at record lows, increasing  
6  
7 388 access to single-occupancy cells will not be feasible without depopulation efforts, and as  
8  
9 389 supported by our model, will not lead to a contained transmission rate alone. Depopulation  
10  
11 390 should continue in concert with single celling, as depopulation reduces density of shared spaces  
12  
13 391 in common areas. Facilities unable to appropriately place individuals in single cells without  
14  
15 392 relying on solitary confinement should embrace depopulation as a preferred strategy.  
16  
17 393 Decarceration will require interagency coordination to achieve the full public health impact,  
18  
19 394 including testing people prior to release.<sup>22</sup> Without testing and ensuring opportunities for  
20  
21 395 community quarantine, correctional facilities may contribute to ongoing transmission in the  
22  
23 396 surrounding community.<sup>23, 24</sup>  
24  
25  
26  
27  
28  
29  
30

31 398 Lastly, asymptomatic testing is an important component of COVID-19 mitigation strategies. This  
32  
33 399 jail focused on asymptomatic testing through contact tracing of people who tested positive,  
34  
35 400 medically vulnerable populations, and upon admission. However, more research needs to be  
36  
37 401 conducted on who should be tested and under what circumstances, including whether mass  
38  
39 402 testing is effective, when individuals should be tested, and at what intervals.  
40  
41  
42  
43

44 404 National and international health agencies, such as the CDC and the World Health Organization,  
45  
46 405 should address depopulation, single celling, and asymptomatic testing in future guidance for  
47  
48 406 detention facilities and should consider how to best implement these measures. Correctional  
49  
50 407 facility administrators will need to consider how to best mitigate the challenges that come with  
51  
52 408 these strategies. For example, coordination of health care and social services organizations prior  
53  
54  
55  
56  
57  
58  
59  
60

1  
2  
3 409 to release should be prioritized, as should considerations of testing when releasing individuals as  
4  
5 410 part of depopulation efforts.<sup>4, 22</sup>  
6  
7

8 411

9  
10 412 *Limitations*

11  
12 413 Our analysis has several limitations. We used a compartmental model which assumes  
13  
14 414 homogeneous mixing among the entire population. Correctional facilities in reality do not exhibit  
15  
16 415 homogeneous mixing, especially across divisions, buildings, or tiers within the facility. Our  
17  
18 416 model does not have the granularity to capture the influence of individuals on transmission  
19  
20 417 dynamics. Our model assumes a relatively stationary population and only accounts for mixing  
21  
22 418 within the jail. Jail populations are highly variable with frequent intakes and releases. Jailed  
23  
24 419 individuals also have variable daily routines, such as where they eat or exercise, which are not  
25  
26 420 accounted for in our model. We did not account for possible false positives, misdiagnosis,  
27  
28 421 overreporting, or underreporting in the dataset. Finally, the many interventions undertaken by the  
29  
30 422 jail make it difficult to determine the causal influence of any one intervention.  
31  
32

33 423

34  
35  
36  
37 424 Importantly, these limitations influence our estimates of  $\beta$  and  $R_0$ . We model the jail as a closed  
38  
39 425 system and thus neglect exogenous infection (e.g., staff or new intake incarcerated individuals  
40  
41 426 who contracted the disease in the community) that likely entered the jail before large-scale  
42  
43 427 testing efforts. Because our analysis assumed that all new infections arise from internal  
44  
45 428 transmission, we likely overestimate the true values of  $\beta$  and  $R_0$ , particularly in the early phases  
46  
47 429 of the epidemic in the jail. Thus, conclusions resulting from our analysis should focus on the  
48  
49 430 relative reductions of  $\beta$  and  $R_0$  rather than the precise estimates of these values.  
50  
51

52 431  
53  
54  
55  
56  
57  
58  
59  
60

## 432 *Conclusions*

433 Despite the limitations of our analysis, we conclude that it is possible to mitigate the spread of  
434 COVID-19 even in correctional settings, where standard physical distancing practices are  
435 difficult to achieve, by implementing depopulation strategies, promoting increased single celling,  
436 and asymptomatic testing with appropriate isolation. The large estimated reduction in the  
437 transmission rate ( $\geq 80\%$ ) from these three intervention strategies is comparable to standard  
438 social distancing measures in a community setting.<sup>25</sup> Even when accounting for potential  
439 additional pre-symptomatic transmission, the relative reductions in  $\beta$  and  $R_0$  remain very high,  
440 further reinforcing the effectiveness of depopulation, single celling, and asymptomatic testing.  
441 As states and the federal government are focused on re-opening economies and resurging  
442 numbers of cases in many states, strategies should be devised to protect those who are  
443 incarcerated and those who work in corrections by further limiting population increases so that  
444 future outbreaks are averted.

445

## 446 **Declaration of interests**

447 All authors have completed the ICMJE uniform disclosure form at  
448 [www.icmje.org/coi\\_disclosure.pdf](http://www.icmje.org/coi_disclosure.pdf) and declare: no support from any organization for the  
449 submitted work; no financial relationships with any organizations that might have an interest in  
450 the submitted work in the previous three years; no other relationships or activities that could  
451 appear to have influenced the submitted work.

452

## 453 **Contributions**

1  
2  
3 454 GM contributed to model design, creation, and implementation, data analysis and manipulation,  
4  
5 455 analysis of results, figure creation, and writing. LP contributed to writing, editing, data  
6  
7 456 collection, study design, and literature review. MB contributed to model design, writing, and  
8  
9 457 editing. TH contributed to writing, editing, and literature search. EW contributed to writing,  
10  
11 458 editing, data collection, study design, and literature search.  
12  
13  
14  
15 459

### 16 17 460 **Transparency declaration**

18  
19 461 GM affirms that this manuscript is an honest, accurate, and transparent account of the study  
20  
21 462 being reported; that no important aspects of the study have been omitted; and that any  
22  
23 463 discrepancies from the study as planned (and, if relevant, registered) have been explained.  
24  
25  
26 464

### 27 28 465 **Acknowledgments**

29  
30 466 We acknowledge the anonymous jail for their prompt collaboration and transparency in  
31  
32 467 providing detailed data on COVID-19 transmission.  
33  
34

### 35 468 **Funding Statement**

36  
37 469 At the time that this work was conducted, GM was supported by grant number T32HS026128  
38  
39 470 from the Agency for Healthcare Research and Quality, MB was supported by grant R37-  
40  
41 471 DA15612 from the National Institute on Drug Abuse, and LP was partially supported by the  
42  
43 472 Veterans Health Administration (grant number N/A). In the past 36 months, EW received  
44  
45 473 research support through Yale University from the Bureau of Justice Administration to study  
46  
47 474 reentry by linking correctional and community health system data (2015-RY-BX-K002) and the  
48  
49 475 Substance Abuse and Mental Health Services Administration to study how to improve the health  
50  
51 476 of women just released from corrections. EW currently receives research support through Yale  
52  
53  
54  
55  
56  
57  
58  
59  
60

1  
2  
3 477 University from the National Cancer Institute of National Institute of Health (1R01CA230444),  
4  
5 478 the National Heart, Lung, and Blood Institute (1R01HL137696), the National Institute of  
6  
7 479 Minority Health and Disparities (1R01MD010403), the National Institute of Drug Abuse  
8  
9 480 (1UG1DA050072 and 3 UG1 DA050072-02S3), and the National Library of Medicine (1  
10  
11 481 R01LM013477-01) to study incarceration and cancer, cardiovascular disease, gun violence,  
12  
13 482 opioid use disorder and COVID-19. She also receives funding from the William T. Grant  
14  
15 483 Foundation (188795) to study health related barriers and facilitators to reducing criminal legal  
16  
17 484 contact and from the California Health Care Foundation (19-002900) to evaluate the Transitions  
18  
19 485 Clinic Network in California. The content is solely the responsibility of the authors and does not  
20  
21 486 necessarily represent the policy or views of any of the funding agencies.  
22  
23  
24  
25

26 487

27 488

### 28 489 **Data Sharing Statement**

29  
30  
31 490 Whenever possible, in accordance with previously signed data usage agreements, we will make  
32  
33 491 the data used in this study available upon reasonable request to GM.  
34  
35  
36  
37

38 492

493 **REFERENCES**

- 494 1. Kaebler D, Cowhig, M. *Correctional Populations in the United States*. Washington, DC:  
495 U.S. Department of Justice, Bureau of Justice Statistics, 2018.
- 496 2. Hawks L, Woolhandler S, McCormick D. COVID-19 in prisons and jails in the United  
497 States. *JAMA Intern Med*. 2020; 180: 1041-2. doi:10.1001/jamainternmed.2020.1856.
- 498 3. Wallace M, Hagan L, Curran KG, et al. COVID-19 in correctional and detention facilities -  
499 United States, February-April 2020. *MMWR Morb Mortal Wkly Rep*. 2020; 69: 587-90.  
500 doi:10.15585/mmwr.mm6919e1.
- 501 4. Kinner SA, Young JT, Snow K, et al. Prisons and custodial settings are part of a  
502 comprehensive response to COVID-19. *Lancet Public Health*. 2020; 5: e188-e9.  
503 doi:10.1016/S2468-2667(20)30058-X.
- 504 5. McCauley E. COVID Case Watch June 3, 2020. <https://covidprisonproject.com/blog/>.  
505 (accessed Aug 1 2020).
- 506 6. The New York Times. Coronavirus in the U.S.: Latest map and case count. *New York Times*.  
507 2020.
- 508 7. Williams T, Ivory D. Coronavirus behind bars: Cook County Jail is top U.S. hot spot. *New*  
509 *York Times*. 2020.
- 510 8. The Legal Aid Society. COVID-19 infection tracking in NYC jails.  
511 <https://legalaidnyc.org/covid-19-infection-tracking-in-nyc-jails/>. (accessed Apr 24 2020).
- 512 9. Centers for Disease Control and Prevention. Interim guidance on management of  
513 Coronavirus Disease 2019 (COVID-19). [https://www.cdc.gov/coronavirus/2019-  
514 \[ncov/downloads/guidance-correctional-detention.pdf\]\(https://www.cdc.gov/coronavirus/2019-ncov/downloads/guidance-correctional-detention.pdf\)](https://www.cdc.gov/coronavirus/2019-ncov/downloads/guidance-correctional-detention.pdf). (accessed Jun 1 2020).
- 515 10. Wei WE, Li Z, Chiew CJ, et al. Presymptomatic transmission of SARS-CoV-2 - Singapore,



- 1  
2  
3 516 January 23-March 16, 2020. *MMWR Morb Mortal Wkly Rep.* 2020; 69: 411-5.  
4  
5 517 doi:10.15585/mmwr.mm6914e1.  
6  
7  
8 518 11. Bai Y, Yao L, Wei T, et al. Presumed asymptomatic carrier transmission of COVID-19.  
9  
10 519 *JAMA.* 2020; 323: 1406-7. doi:10.1001/jama.2020.2565.  
11  
12 520 12. Lauer SA, Grantz KH, Bi Q, et al. The incubation period of Coronavirus disease 2019  
13  
14 521 (COVID-19) from publicly reported confirmed cases: estimation and application. *Ann Intern*  
15  
16 522 *Med.* 2020; 172: 577-82. doi:10.7326/M20-0504.  
17  
18  
19 523 13. Oran DP, Topol EJ. Prevalence of asymptomatic SARS-CoV-2 infection: a narrative review.  
20  
21 524 *Ann Intern Med.* 2020; 173: 362-7. doi:10.7326/M20-3012.  
22  
23  
24 525 14. Arons MM, Hatfield KM, Reddy SC, et al. Presymptomatic SARS-CoV-2 infections and  
25  
26 526 transmission in a skilled nursing facility. *N Engl J Med.* 2020; 382: 2081-90.  
27  
28 527 doi:10.1056/NEJMoa2008457.  
29  
30  
31 528 15. Rocklöv J, Sjödin H, Wilder-Smith A. COVID-19 outbreak on the Diamond Princess cruise  
32  
33 529 ship: estimating the epidemic potential and effectiveness of public health countermeasures. *J*  
34  
35 530 *Travel Med.* 2020; 27: taaa030. doi:10.1093/jtm/taaa030.  
36  
37  
38 531 16. Thevarajan I, Nguyen THO, Koutsakos M, et al. Breadth of concomitant immune responses  
39  
40 532 prior to patient recovery: a case report of non-severe COVID-19. *Nat Med.* 2020; 26: 453-5.  
41  
42 533 doi:10.1038/s41591-020-0819-2.  
43  
44  
45 534 17. Diekmann O, Heesterbeek JA, Metz JA. On the definition and the computation of the basic  
46  
47 535 reproduction ratio  $R_0$  in models for infectious diseases in heterogeneous populations. *J*  
48  
49 536 *Math Biol.* 1990; 28: 365-82. doi:10.1007/BF00178324.  
50  
51  
52 537 18. Heffernan JM, Smith RJ, Wahl LM. Perspectives on the basic reproductive ratio. *J R Soc*  
53  
54 538 *Interface.* 2005; 2: 281-93. doi:10.1098/rsif.2005.0042.  
55  
56  
57  
58  
59  
60

- 1  
2  
3 539 19. He X, Lau EHY, Wu P, et al. Temporal dynamics in viral shedding and transmissibility of  
4  
5 540 COVID-19. *Nat Med*. 2020; 26: 672-5. doi:10.1038/s41591-020-0869-5.  
6  
7  
8 541 20. Moghadas SM, Fitzpatrick MC, Sah P, et al. The implications of silent transmission for the  
9  
10 542 control of COVID-19 outbreaks. *Proc Natl Acad Sci U S A*. 2020; 117: 17513-5.  
11  
12 543 doi:10.1073/pnas.2008373117.  
13  
14  
15 544 21. Cloud D, Augustine, D., Ahalt, C., Williams, B. The Ethical Use of Medical Isolation - Not  
16  
17 545 Solitary Confinement - to Reduce COVID-19 Transmission in Correctional Settings.  
18  
19 546 [https://amend.us/wp-content/uploads/2020/04/Medical-Isolation-vs-Solitary\\_Amend.pdf](https://amend.us/wp-content/uploads/2020/04/Medical-Isolation-vs-Solitary_Amend.pdf).  
20  
21 547 (accessed Sep 1 2020).  
22  
23  
24 548 22. National Academies of Sciences Engineering and Medicine. Decarcerating Correctional  
25  
26 549 Facilities During COVID-19: Advancing Health, Equity, and Safety. Washington,  
27  
28 550 D.C.2020.  
29  
30  
31 551 23. Reinhart E, Chen D. Incarceration and its disseminations: COVID-19 pandemic lessons  
32  
33 552 from Chicago's Cook County Jail. *Health Aff (Millwood)*. 2020; 39: COVID-19.  
34  
35 553 doi:10.1377/hlthaff.2020.00652.  
36  
37  
38 554 24. Lofgren E, Lum K, Horowitz A, et al. The epidemiological implications of incarceration  
39  
40 555 dynamics in jails for community, corrections officer, and incarcerated population risks from  
41  
42 556 COVID-19. <https://www.medrxiv.org/content/10.1101/2020.04.08.20058842v2.full.pdf>.  
43  
44 557 (accessed Jun 1 2020).  
45  
46  
47 558 25. Lewnard JA, Lo NC. Scientific and ethical basis for social-distancing interventions against  
48  
49 559 COVID-19. *Lancet Infect Dis*. 2020; 20: 631-3. doi:10.1016/S1473-3099(20)30190-0.  
50  
51 560  
52  
53  
54 561  
55 562

1  
2  
3 **563 Figures**  
4

5  
6 **564**

7  
8 **565** Figure 1. Structure of the disease transmission model. The disease states included susceptible ( $S$ )  
9 **566** ), exposed ( $E$ ), infected symptomatic ( $I_{sym}$ ), infected asymptomatic ( $I_{asym}$ ), infected  
10 **567** asymptomatic undetected ( $I_{asym,undetected}$ ), quarantined ( $Q$ ), quarantined asymptomatic ( $Q_{asym}$ ),  
11 **568** hospitalized ( $H$ ), and recovered ( $Rec$ ) individuals. Detection and subsequent quarantine of  
12 **569** asymptomatic individuals are only considered after the start of asymptomatic testing in phase 4.  
13  
14 **570**

15 **571**

16 **572** Figure 2. Change in the total population of the jail and the portion of the population in single-  
17 **573** occupancy cells over the course of the outbreak. As depopulation increases, the overall  
18 **574** population as a proportion of the population on day 1 of the outbreak decreases. Additionally, the  
19 **575** proportion of incarcerated people in single-occupancy cells increases over time. We denote the  
20 **576** timing of each intervention phase on the graph. Phase 1: initial outbreak, Phase 2: depopulation  
21 **577** began, Phase 3: increased single celling, Phase 4: widespread testing of asymptomatic  
22 **578** incarcerated individuals.  
23 **579**

24  
25  
26 **580** Figure 3. Comparison of the daily number of incident symptomatic cases in the model with  
27 **581** reported new symptomatic COVID-19 cases at the jail. Shaded gray area represents 95% credible  
28 **582** interval of model runs. We denote the timing of each intervention phase on the graph. Phase 1:  
29 **583** initial outbreak, Phase 2: depopulation began, Phase 3: increased single celling, Phase 4:  
30 **584** widespread testing of asymptomatic incarcerated individuals.  
31 **585**

32  
33  
34 **586** Figure 4. Calibrated values of the transmission rate  $\beta$  for different outbreak phases (Phase 1:  
35 **587** initial outbreak, Phase 2: depopulation began, Phase 3: increased single celling, Phase 4:  
36 **588** widespread testing of asymptomatic incarcerated individuals). CDC guidelines were  
37 **589** implemented during all four phases. Boxes denote 25th percentile, median, and 75<sup>th</sup> percentile.  
38  
39 **590**

40  
41 **591** Figure 5. Calculated values of the effective reproduction ratio  $R_t$  for all intervention phases  
42 **592** (Phase 1: initial outbreak, Phase 2: depopulation began, Phase 3: increased single celling, Phase  
43 **593** 4: widespread testing of asymptomatic incarcerated individuals). CDC guidelines were  
44 **594** implemented during all four phases. Shaded area around each line reflects the 95% credible  
45 **595** interval.  
46  
47 **596**

1  
2  
3 597 Figure 6. Projected number of incident symptomatic cases per day for all intervention phases  
4 598 (Phase 1: initial outbreak, Phase 2: depopulation began, Phase 3: increased single ceiling, Phase  
5 599 4: widespread testing of asymptomatic incarcerated individuals). CDC guidelines were  
6 600 implemented during all four phases. Shaded area around each line reflects the 95% credible  
7 601 interval.  
8 602  
9  
10  
11  
12  
13  
14  
15  
16  
17  
18  
19  
20  
21  
22  
23  
24  
25  
26  
27  
28  
29  
30  
31  
32  
33  
34  
35  
36  
37  
38  
39  
40  
41  
42  
43  
44  
45  
46  
47  
48  
49  
50  
51  
52  
53  
54  
55  
56  
57  
58  
59  
60

For peer review only

**Table 1. Base Case Parameter Estimates**

| Name          | Description                                                | Value                                                                               | Source       |
|---------------|------------------------------------------------------------|-------------------------------------------------------------------------------------|--------------|
| $b$           | Net rate of entrance into the jail, phase 1 [1/day]        | -0.004                                                                              | Jail dataset |
|               | Net rate of entrance into the jail, phase 2 [1/day]        | -0.0141                                                                             |              |
|               | Net rate of entrance into the jail, phase 3 [1/day]        | -0.0076                                                                             |              |
|               | Net rate of entrance into the jail, phase 4 [1/day]        | 0.0005                                                                              |              |
| $\beta$       | Transmission rate [1/day]                                  |                                                                                     | Calibrated   |
| $\varepsilon$ | Incubation period <sup>-1</sup> [1/day]                    | 0.18                                                                                | 12           |
|               |                                                            | Incubation period: <i>Lognormal</i> (5.1, 0.89)                                     |              |
| $\alpha$      | Proportion of cases that are asymptomatic                  | 0.405                                                                               | 13, 14       |
|               |                                                            | <i>uniform</i> (0.25, 0.56)                                                         |              |
| $\gamma$      | Recovery rate [1/day]                                      | 0.1                                                                                 | 15, 16       |
|               |                                                            | Infection period:<br><i>Truncated N</i> (10, 6.25, <i>min</i> = 5, <i>max</i> = 20) |              |
| $\eta$        | Proportion of symptomatic infections that are hospitalized | 0.14                                                                                | Jail dataset |
| $\mu$         | Recovery rate from hospital [1/day]                        | 0.2                                                                                 | 16           |
|               |                                                            | Length of hospitalization: <i>Lognormal</i> (5,1)                                   |              |
| $d_I$         | Probability of death due to symptomatic COVID-19 infection | 0.01                                                                                | Jail dataset |

**Table 2. Intervention Effects: Estimated Transmission Rates ( $\beta$ ), Effective Reproduction Ratios ( $R_0$ ), and Disease Cases for each Outbreak Phase**

| Phase                                                          | Time Range in Days | $\beta$<br>(95% CrI)  | $R_0$<br>(95% CrI)     | Reduction in $\beta$ and $R_0$ from Previous Phase | Expected Total Symptomatic Cases, Day 83*<br>(95% CrI) | Expected Total Hospitalizations, Day 83*<br>(95% CrI) | Expected Total Deaths, Day 83*<br>(95% CrI) | Expected Total Cases, Day 200*<br>(95% CrI) |
|----------------------------------------------------------------|--------------------|-----------------------|------------------------|----------------------------------------------------|--------------------------------------------------------|-------------------------------------------------------|---------------------------------------------|---------------------------------------------|
| 1: Initial outbreak                                            | 1 – 11             | 1.79<br>(1.35 - 2.22) | 8.44<br>(5.00 - 13.10) |                                                    | 3,758<br>(3,656 – 3,820)                               | 526<br>(512 - 535)                                    | 38<br>(29 - 47)                             | 6,365<br>(6,310 - 6,425)                    |
| 2: Depopulation                                                | 12 – 17            | 0.78<br>(0.61 – 0.97) | 3.64<br>(2.43 - 5.11)  | 56%                                                | 2,317<br>(2,106 - 2,495)                               | 324<br>(295 - 349)                                    | 24<br>(20 - 28)                             | 4,056<br>(3,660 - 4,280)                    |
| 3: Increased single celling                                    | 18 – 36            | 0.38<br>(0.28 - 0.52) | 1.72<br>(1.40 - 2.12)  | 51%                                                | 1,225<br>(998 - 1,508)                                 | 171<br>(140 - 211)                                    | 12.3<br>(11.5 – 13.0)                       | 2,961<br>(2,315 - 3,513)                    |
| 4: Widespread testing of asymptomatic incarcerated individuals | 37 – 83            | 0.13<br>(0.07 - 0.24) | 0.58<br>(0.43 - 0.75)  | 66%                                                | 635<br>(506 - 821)                                     | 89<br>(71 - 115)                                      | 6.3<br>(5.8 – 6.7)                          | 1,144<br>(923 - 1,459)                      |
| Jail data: Day 83 of outbreak                                  |                    |                       |                        |                                                    | 778                                                    | 67                                                    | 10                                          |                                             |

\* Assuming the value of  $\beta$  estimated for this intervention phase occurs during all subsequent days

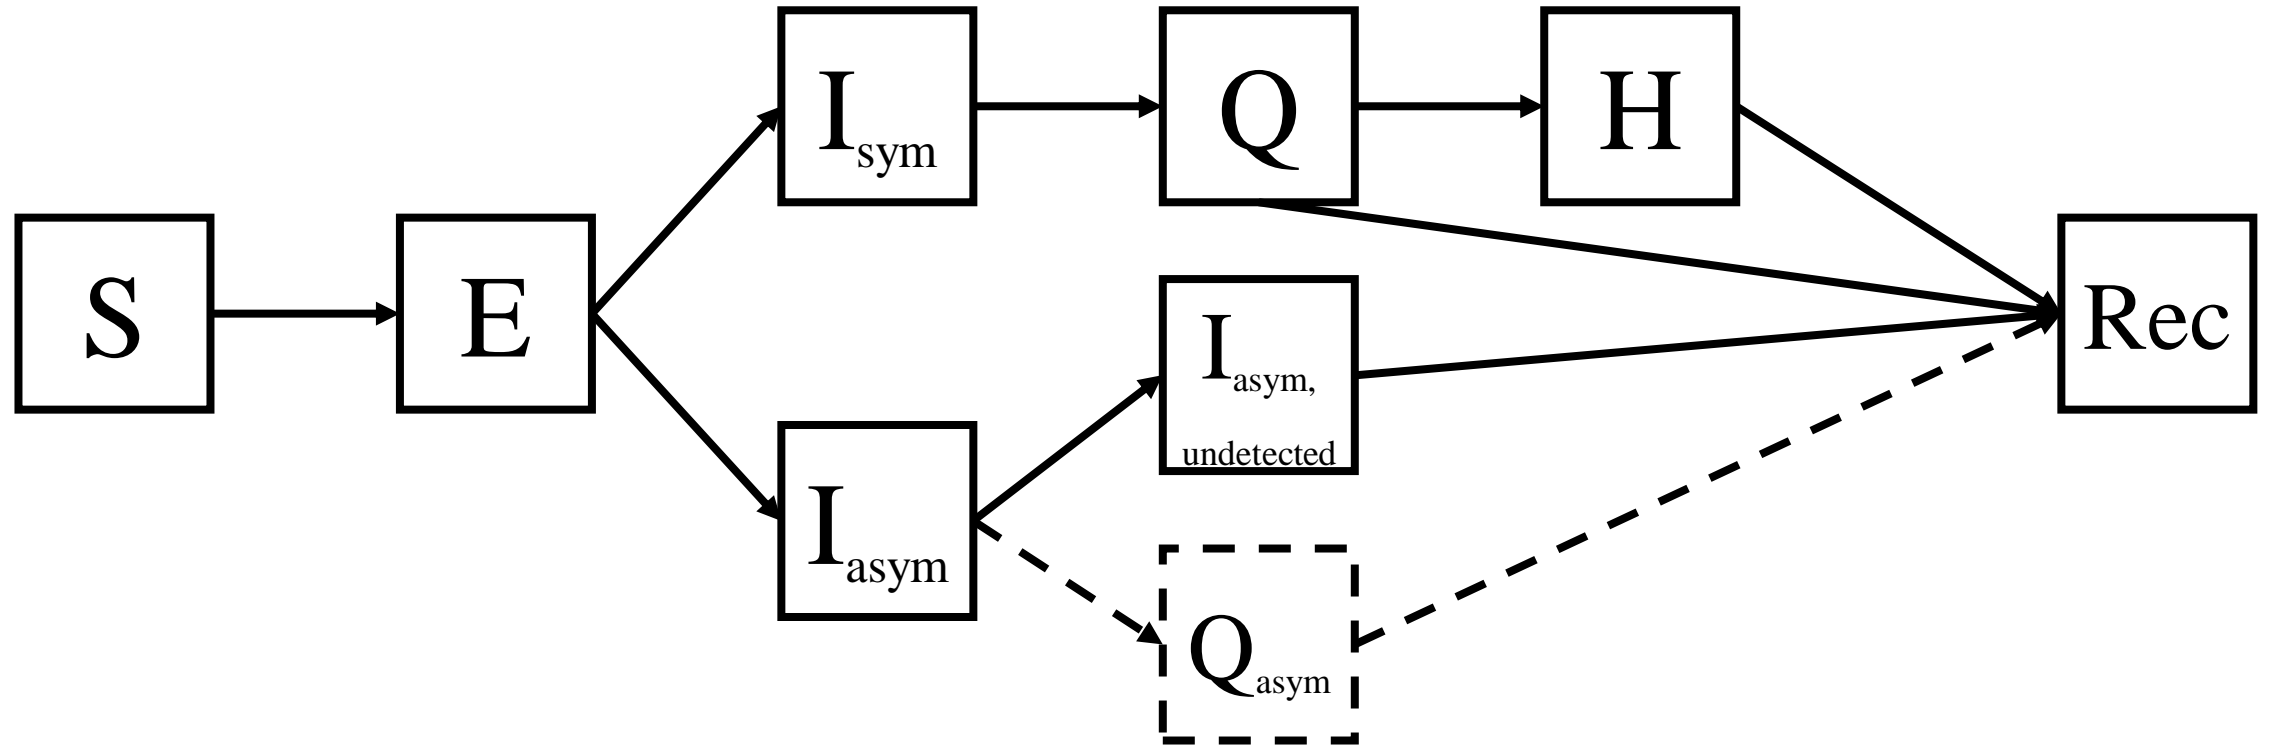

(After asymptomatic testing begins)

1  
2  
3  
4  
5  
6  
7  
8  
9  
10  
11  
12  
13  
14  
15  
16  
17  
18  
19  
20  
21  
22  
23  
24  
25  
26  
27  
28  
29  
30  
31  
32  
33  
34  
35  
36  
37  
38  
39  
40  
41

BMJ Open  
Population as Proportion of Population Day 1  
Proportion of Current Population in Single Cell

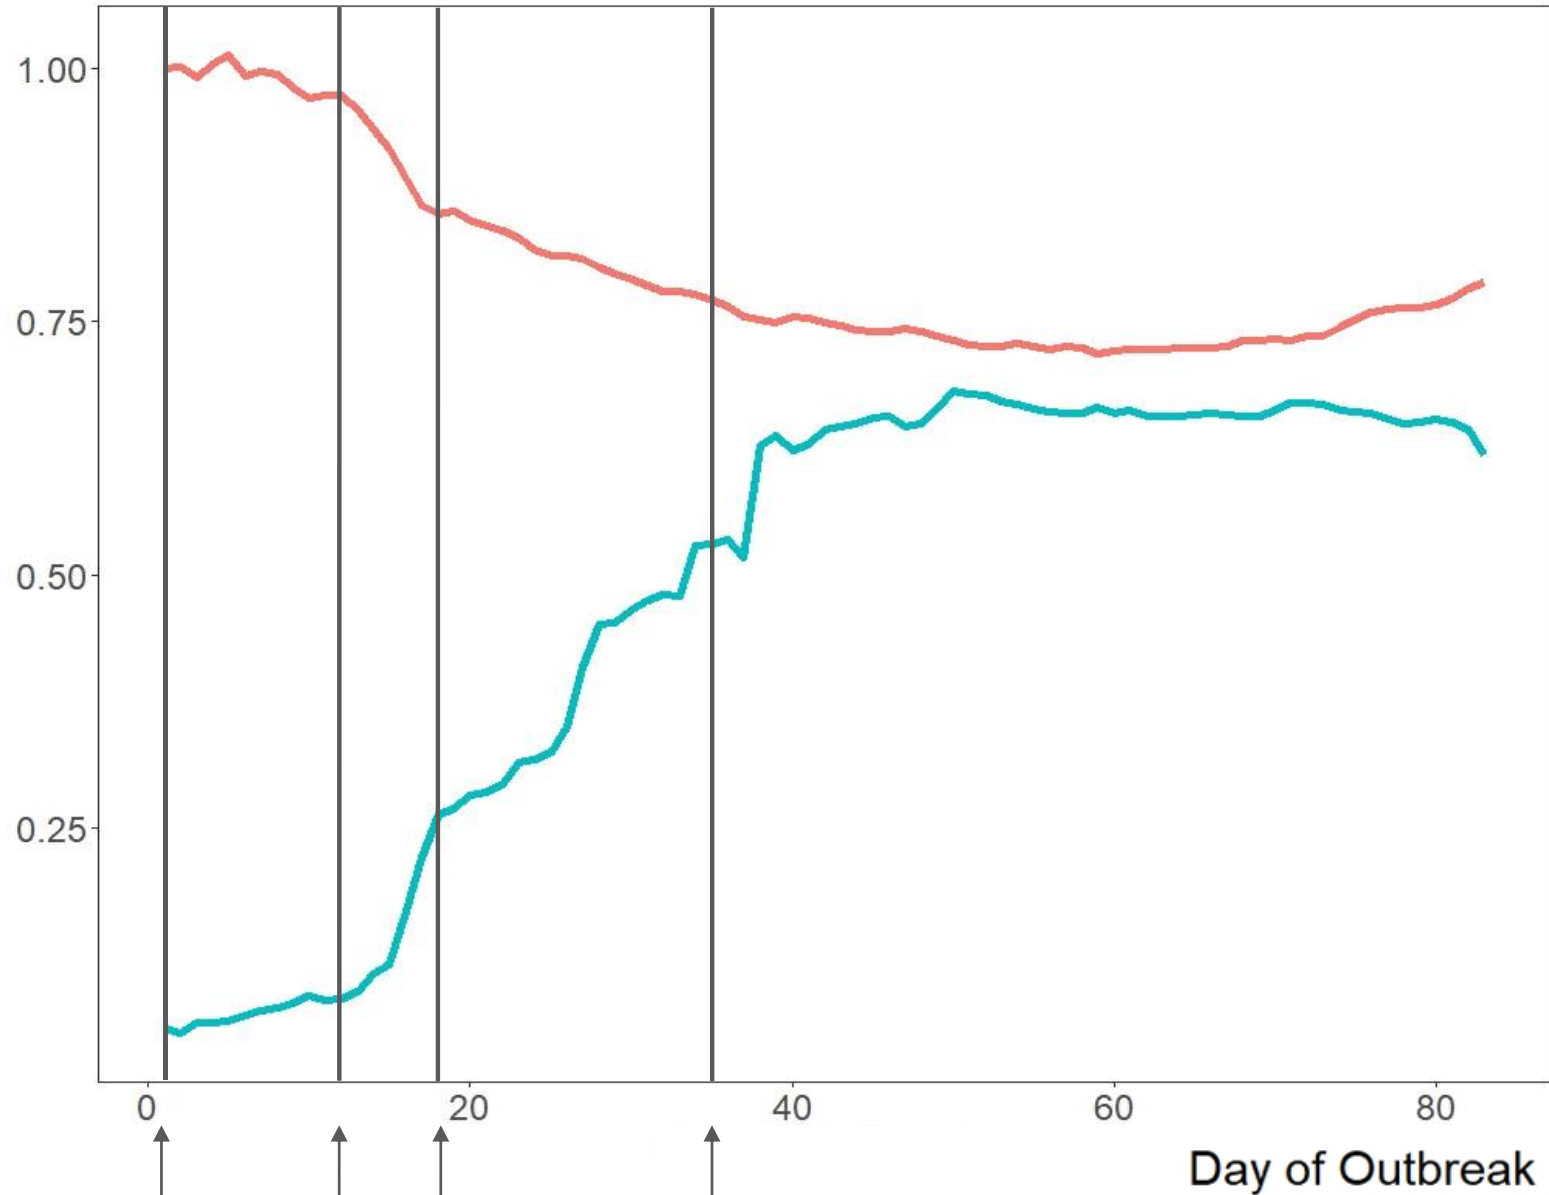

Phase 1 begins Phase 2 begins Phase 3 begins Phase 4 begins  
For peer review only - <http://bmjopen.bmj.com/site/about/guidelines.xhtml>

1  
2  
3  
4  
5  
6  
7  
8  
9  
10  
11  
12  
13  
14  
15  
16  
17  
18  
19  
20  
21  
22  
23  
24  
25  
26  
27  
28  
29  
30  
31  
32  
33  
34  
35  
36  
37  
38  
39  
40  
41



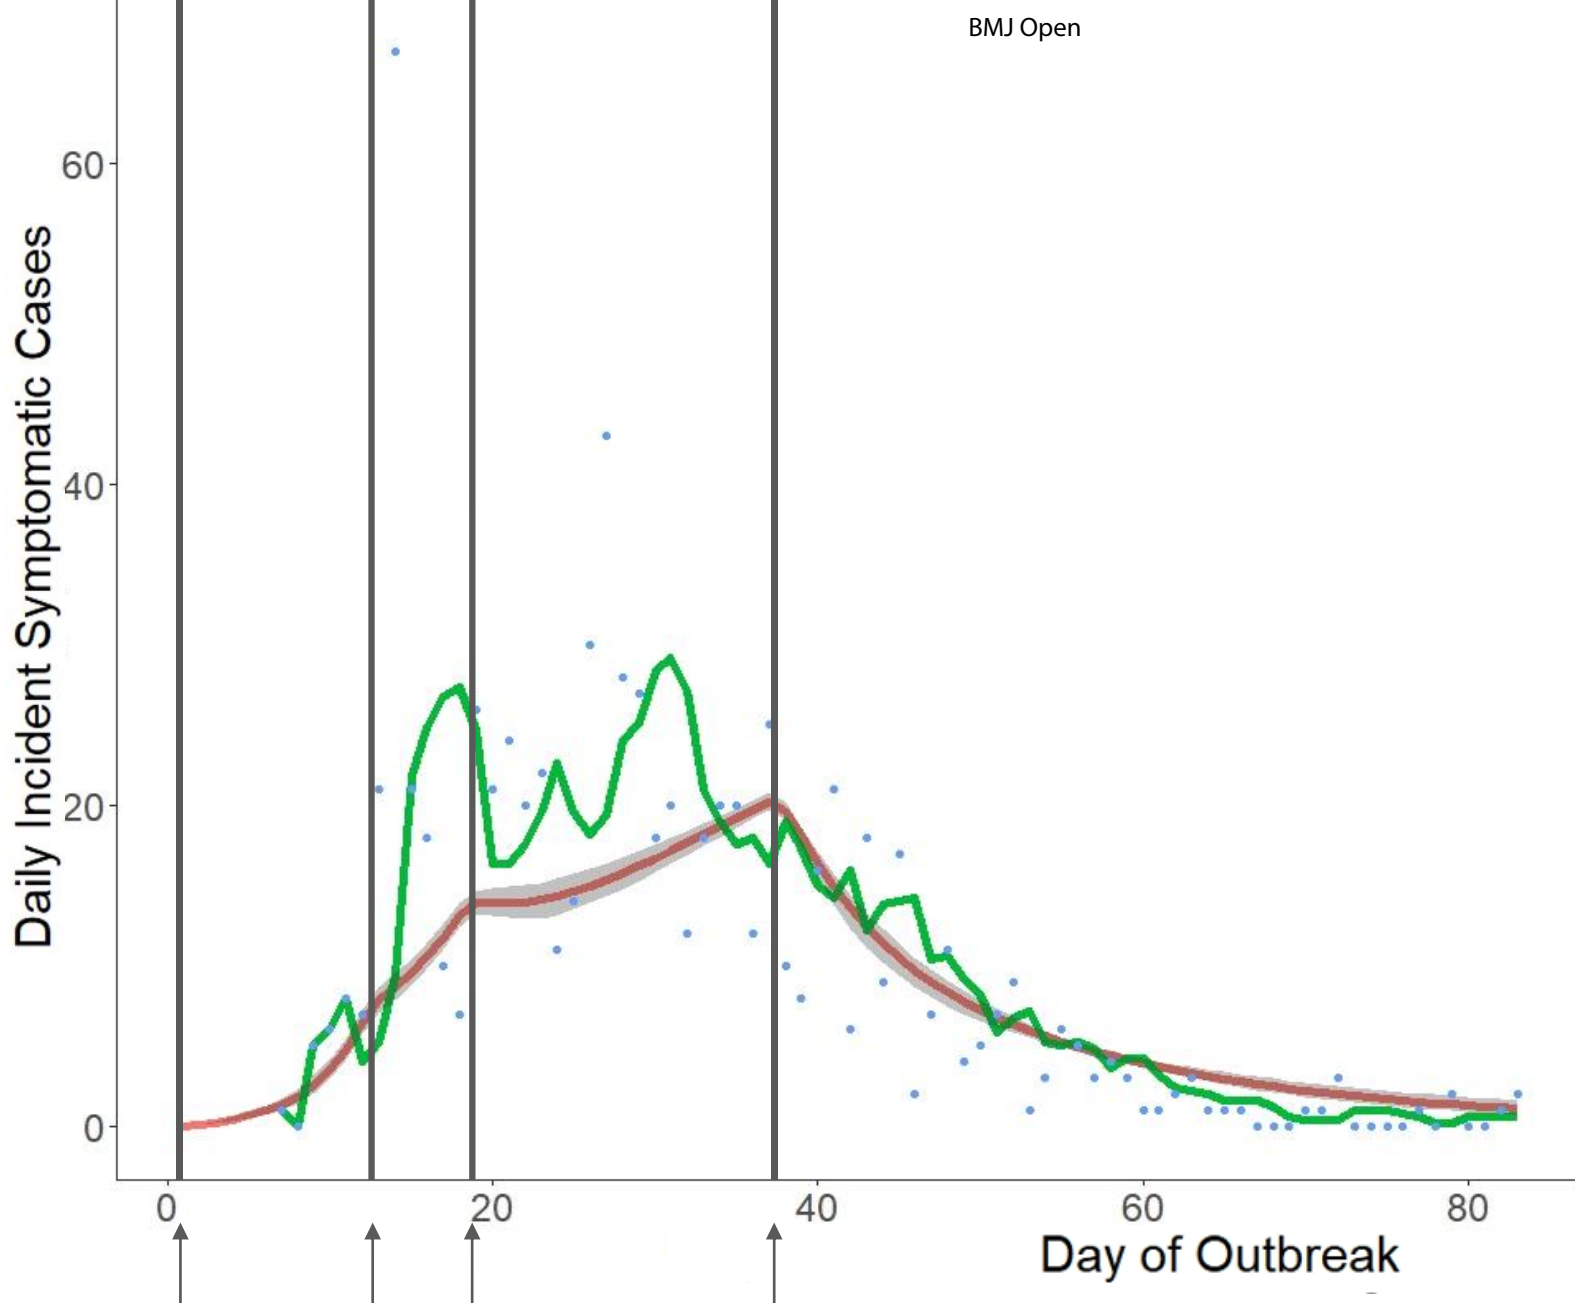

Phase 1 begins    Phase 2 begins    Phase 3 begins    Phase 4 begins

For peer review only - <http://bmjopen.bmj.com/site/about/guidelines.xhtml>

1  
2  
3  
4  
5  
6  
7  
8  
9  
10  
11  
12  
13  
14  
15  
16  
17  
18  
19  
20  
21  
22  
23  
24  
25  
26  
27  
28  
29  
30  
31  
32  
33  
34  
35  
36  
37  
38  
39  
40  
41

1  
2  
3  
4  
5  
6  
7  
8  
9  
10  
11  
12  
13  
14  
15  
16  
17  
18  
19  
20  
21  
22  
23  
24  
25  
26  
27  
28  
29  
30  
31  
32  
33  
34  
35  
36  
37  
38  
39  
40  
41  
42  
43  
44  
45  
46  
47  
48  
49  
50  
51  
52  
53  
54  
55  
56  
57  
58  
59  
60

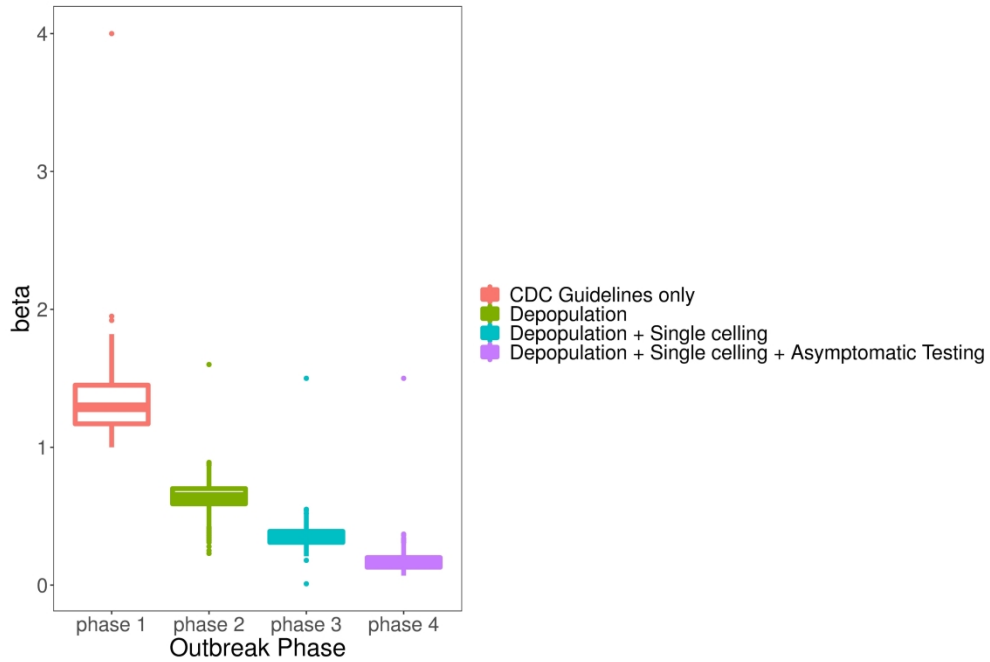

Figure 4. Calibrated values of the transmission rate  $\beta$  for different outbreak phases (Phase 1: initial outbreak, Phase 2: depopulation began, Phase 3: increased single celling, Phase 4: widespread testing of asymptomatic incarcerated individuals). CDC guidelines were implemented during all four phases. Boxes denote 25th percentile, median, and 75th percentile.

317x211mm (300 x 300 DPI)

1  
2  
3  
4  
5  
6  
7  
8  
9  
10  
11  
12  
13  
14  
15  
16  
17  
18  
19  
20  
21  
22  
23  
24  
25  
26  
27  
28  
29  
30  
31  
32  
33  
34  
35  
36  
37  
38  
39  
40  
41  
42  
43  
44  
45  
46  
47  
48  
49  
50  
51  
52  
53  
54  
55  
56  
57  
58  
59  
60

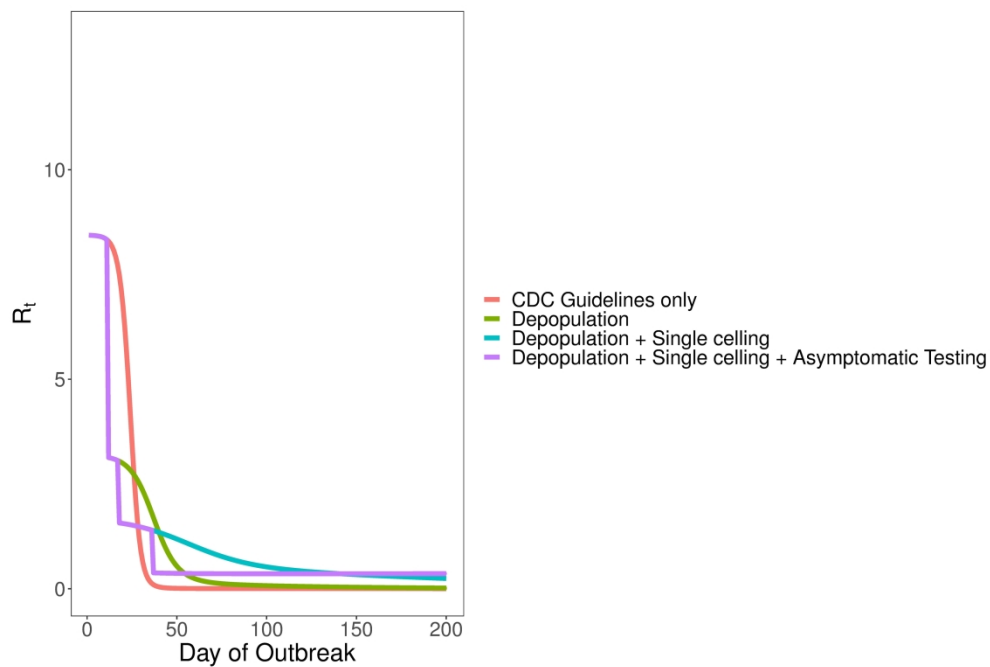

Figure 5. Calculated values of the effective reproduction ratio  $R_t$  for all intervention phases (Phase 1: initial outbreak, Phase 2: depopulation began, Phase 3: increased single celling, Phase 4: widespread testing of asymptomatic incarcerated individuals). CDC guidelines were implemented during all four phases. Shaded area around each line reflects the 95% credible interval.

317x211mm (300 x 300 DPI)

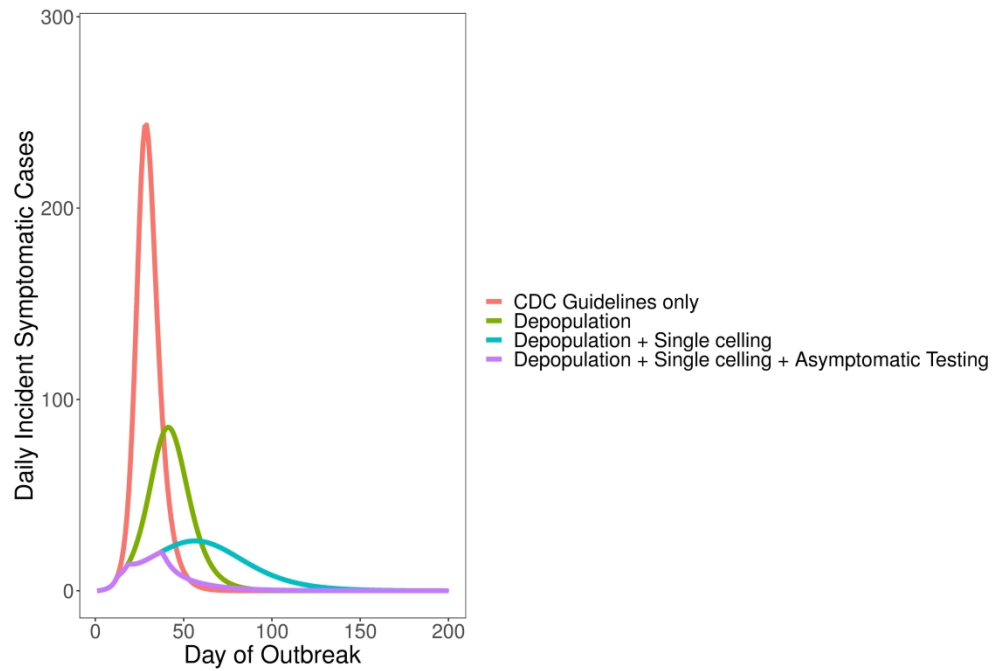

Figure 6. Projected number of incident symptomatic cases per day for all intervention phases (Phase 1: initial outbreak, Phase 2: depopulation began, Phase 3: increased single celling, Phase 4: widespread testing of asymptomatic incarcerated individuals). CDC guidelines were implemented during all four phases. Shaded area around each line reflects the 95% credible interval.

317x211mm (300 x 300 DPI)
